# Supplementary material for: Two weeks after the 2023 Maui wildfires: drinking water experiences and needs
Source: Royal Society of Chemistry journal article supplement (doi:10.1039/d4ew00216d), 2024-01-01
Supplement: d4ew00216d1.pdf [file d4ew00216d1.pdf]

## Supporting Information File

### Two Weeks After the 2023 Maui Wildfires: Drinking Water Experiences and Needs

*Andrew J. Whelton*<sup>\*1</sup>, *Paula D. Coelho*<sup>2</sup>, *Christopher Shuler*<sup>3</sup>, *Aurora Kagawa-Viviani*<sup>4</sup>, *Kellie D.P. Cole*<sup>5</sup>, *Stefanie Surdyka*<sup>7</sup>, *Stephanie Heffner*<sup>7</sup>

1. Andrew J. Whelton, Ph.D., Lyles School of Civil Engineering, Division of Environmental and Ecological Engineering, Center for Plumbing Safety, Purdue University, West Lafayette, Indiana, USA, [awhelton@purdue.edu](mailto:awhelton@purdue.edu)

2. Paula D. Coelho, Division of Environmental and Ecological Engineering, Purdue University, West Lafayette, Indiana, USA, [coelho1@purdue.edu](mailto:coelho1@purdue.edu)

3. Christopher Shuler, Water Resources Research Center and Hawai'i Sea Grant College Program University of Hawai'i at Mānoa, Honolulu, Hawai'i, USA, [cshuler@hawaii.edu](mailto:cshuler@hawaii.edu)

4. Aurora Kagawa-Viviani, Water Resources Research Center and Department of Geography and Environment, University of Hawai'i at Mānoa, Honolulu, Hawai'i, USA, [kagawa@hawaii.edu](mailto:kagawa@hawaii.edu)

5. Kellie D.P. Cole, Water Resources Research Center and Sustainability Science Management Program, University of Hawai'i Maui College, Hawai'i, USA; [kpenman@hawaii.edu](mailto:kpenman@hawaii.edu)

6. Stefanie Surdyka, Davidson School of Chemical Engineering, Purdue University, West Lafayette, Indiana, USA, [ssurdyka@purdue.edu](mailto:ssurdyka@purdue.edu)

7. Stephanie Heffner, Division of Environmental and Ecological Engineering, Purdue University, West Lafayette, Indiana, USA, [sheffne@purdue.edu](mailto:sheffne@purdue.edu)

(\*) Corresponding author: Andrew J. Whelton, Ph.D., Lyles School of Civil Engineering, Division of Environmental and Ecological Engineering, Center for Plumbing Safety, Purdue University, West Lafayette, Indiana, USA, [awhelton@purdue.edu](mailto:awhelton@purdue.edu)

## **Table of Contents**

SI Video 1. Olinda Fire - Some households first learned there was a fire threat to their property when they witnessed active fires burning nearby

SI Video 2. Kula Fire - After the evacuation order was lifted a homeowner used sprinklers to suppress spot fires on their property

SI Video 3. Kula Fire - A spot fire ignited while the authors were conducting property inspections.

SI Video 4. Kula - Water buffalos were located at various locations in the community.

SI Video 5. Maui Fires - Underground fire observed on agricultural property by the authors.

SI Video 6. Maui Fires - An underground spot fire was observed by the property owner before the authors arrived for the inspection.

SI-1. Event Timeline

Table SI-1. Census Data for Kula and Lahaina, Hawai‘i

SI-3. Survey Instrument

SI-4. SI File References

## SI-1. Event Timeline

*Time stamps provided where available. References included at the end of the document.*

August 2, 2023

Hurricane Dora named by the U.S., National Hurricane Center <sup>1</sup>

August 6, 2023

Red flag warning issued by the Maui Environmental Management Agency (MEMA) and the Hawai'i Emergency Management Agency (HI EMA) <sup>2</sup>

August 7, 2023

15:42 High Wind Warning Downslope Leeward issued by the MEMA <sup>3</sup>

21:00 (Maui News) County officials meet and partially activate the Emergency Operations Center in Wailuku, two MEMA staff stay overnight <sup>4</sup>

18:45 (Maui Electric) Moloka'i power outage due to downed power lines from high wind<sup>5</sup>

22:47 The Olinda Fire began at the Bird Conservation Center according to security footage from the Maui Bird Conservation Center <sup>6</sup>

**22:47 Fire first reported in Olinda, named the Olinda Fire <sup>7</sup>**

22:52 The Hawai'i Electric Company (HECO) received a first call of an outage in Olinda and dispatched a troubleman <sup>8</sup>

August 8, 2023

00:22 Evacuations begin Olinda <sup>9</sup>

00:26 Tree blocking roadway seen at 10400 Haleakalā Highway <sup>10</sup>

03:05 Officer injured in response to Olinda Fire, transported to hospital <sup>11</sup>

03:45 An evacuation order was issued for the Makawao Auli'i Drive area in response to the Olinda Fire <sup>12</sup>

04:19 An evacuation order was issued for the Kula 200 area in response to the Olinda Fire<sup>13</sup>

04:50 Hanamu Road in Makawao is evacuated in response to the Olinda Fire <sup>14</sup>

05:00 West Maui transmission line tripped offline automatically, requiring manual activation per Reclose Blocking Procedure in Lahaina <sup>15</sup>

05:00 Multiple utility poles down on Honoapiilani Highway between Keawe and Kenui St. in Lahaina <sup>16</sup>

05:32 An evacuation order is issued for multiple streets near Kula's King Kekaulike High School in response to the Olinda Fire <sup>17</sup>

05:15 Power outages from Lahaina to Napili, Olinda to Pi'iholo, and Kamehameha Highway Moloka'i are reported <sup>18</sup>

06:20 Power is restored to Lahaina <sup>19</sup>

06:21 Police evacuate 13000 block of Haleakalā Highway <sup>20</sup>

06:30 Maui Mayor Bissen arrives at the Emergency Operations Center in Wailuku <sup>21</sup>

**06:37 Fire first reported in Lahaina on Lahainaluna Road, named the Lahaina Fire<sup>22</sup>**

06:39 West Maui transmission line tripped offline automatically according to HECO, requiring manual activation per Reclose Blocking Procedure <sup>23</sup>

08:17 Maui Fire Department reporting pole #843 down on Makanoe Place. There is room to drive around. Requesting lines to be de-energized <sup>24</sup>

09:00 The Lahaina Fire is reported to be 100% contained according to Maui County <sup>25</sup>

09:00 Winds began increasing in Kula according to resident reports <sup>26</sup>

09:25 The HECO attempts to restore power to several thousand customers in West Maui and Upcountry <sup>27</sup>

09:45 The HECO addressing three main transmission lines down in Lahaina <sup>28</sup>

09:45 The HECO responds to downed powerlines in Olinda to Pi'iholo and first outages are reported in Kula <sup>29</sup>

10:00 Powerline arcing witnessed above Kula Lodge in Kula, by residents near Highway 377 <sup>30</sup>

11:00 The MEMA announces the road closure on Lahainaluna Rd from Kelawea Street to Kuialua Street <sup>31</sup>

**11:15 Fire first reported in Kula by residents, named the Kula Fire: Single powerful gust that knocked down trees in several areas including the Eucalyptus that landed on the powerline which shot sparks mauka (uphill) into Kulalani Gulch starting Kula fire, neighbors called fire department and began hosing down gulch. Approximately happening near 15400 Haleakalā Highway, Kula. <sup>32</sup>**

11:27 The fire department responds to Kulalani Gulch Kualono Place according to Maui County. The fire behaves erratically from the storm, not supposed to move downhill, wind intensity, not many timestamps due to chaotic situation <sup>33</sup>

11:45 Firefighters tell the Ainakula neighborhood to stand by for evacuation orders <sup>34</sup>

11:36 Engine 14 unable to get through due to downed power lines <sup>35</sup>

12:27 High wind and fire alerts are issued by the U.S. National Weather Service <sup>36</sup>

13:00 Lahaina power poles sway in the wind as shown by a resident of Lahaina town's video <sup>37</sup>

13:19 According to the MEMA, Lahainaluna Road is reopened, and the following road closures were in place: Honoapiilani St from Front St. to Hokiokio, Wahee from Dickenson to Lahainaluna, Road Partially closed and blocked off from Honoapiilani / Keawe. Right hand turn lane from Honoapiilani to Keawe blocked with cones <sup>38</sup>

13:37 According to the MEMA, shelters open at Hannibal Tavares and Lahaina Civic Center for displaced residents <sup>39</sup>

14:34 According to the MEMA, structural damage self-reporting begins for Maui County  
According to the MEMA, Pi'iholo and Olinda Road are evacuated in response to the Olinda Fire <sup>40</sup>

14:50 An officer observed multiple utility poles breaking at their base and falling into the highway, obstructing multiple lanes.<sup>41</sup>

14:55 Fire reported on Lahainaluna Rd. to the Maui Police Department <sup>42</sup>

15:52 Pi'iholo and Olinda Road are evacuated in response to the Olinda Fire <sup>43</sup>

15:27 According to the HI Department of Transportation (DOT), Haleakalā Highway is closed between Kulalani Dr. and Kualono Pl. in Kula due to a brush fire <sup>44</sup>

**15:30 The brushfire that was contained in Lahaina reignites, and the Lahaina Fire begins <sup>45</sup>**

15:30 According to Maui County, a shelter in place advisory, evacuation, and road closure are issued <sup>46</sup>

**15:40 According to the MEMA, a High Wind Warning is issued with localized gusts over 65 miles per hour <sup>47</sup>**

**15:43 Acting governor, Lt. Gov Sylvia Luke, issues an emergency proclamation to activate assistance from State National Guard** <sup>48</sup>

15:55 The HECO activates their incident management team <sup>49</sup>

15:56 The HECO acknowledges 600 upcountry customers are without 30 spans of power lines<sup>50</sup>

15:56 The HECO reports that 12,400 customers are off line and there are more than 30 downed poles on the west side of Maui <sup>51</sup>

16:17 The MEMA orders an evacuation for Kulalani Circle and Kulalani Drive, Kula <sup>52</sup>

16:26 The MEMA orders an evacuation for the Lahaina Kelaweia Mauka subdivision, Lahaina<sup>53</sup>

17:05 The MEMA announces that the Hokiokio powerlines in Lahaina are cleared and opened to the bypass to let cars out of Lahaina <sup>54</sup>

17:06 There is a road closure of Lahaina Bypass, Kahakuloa is now restricted to Kahakuloa residents only <sup>55</sup>

17:33 Lahaina residents jumped into ocean water as flames approached Front Street according to resident reports <sup>56</sup>

17:59 Pūlehu Fire begins on Pūlehu Rd heading toward Kīhei <sup>57</sup>

**20:00 Maui County Mayor Bissen signs an emergency proclamation** <sup>58</sup>

20:00 Residents on Olinda Road, Olinda are trapped by fallen trees, fire approaching and burning homes, then winds switch direction, sparing people and homes according to resident reports.<sup>59</sup>

20:00 Water is seen pouring out of burned structures in Kula according to Maui Fire Department <sup>60</sup>

21:19 According to the MEMA, no power is at shelters Hannibal Tavares and Kīhei Community Center in Makawao and Kīhei <sup>61</sup>

21:26 Police evacuate residents on Kaiwahine Street <sup>62</sup>

21:29 Kīhei officers escort buses to and from Coast Guard Station Maui with ocean evacuees <sup>63</sup>

21:30 Police evacuate the Kula Lodge area <sup>64</sup>

21:30 According to the HI DOT, state routes closed in Lahaina, Kīhei , and Makawao <sup>65</sup>

21:45 Water buffaloes are placed at Kula Fire Station, Kula Community Center, Rice Park, and Crater Road – Hydrant 373 <sup>66</sup>

22:00 Water loss from damaged and destroyed buildings is observed in Kula by residents<sup>67</sup>

22:06 According to the MEMA, a shelter is opened at Maui High School <sup>68</sup>

23:19 Police coordinating with Kaanapali hotels and preparing for possible mass evacuations <sup>69</sup>

23:51 According to the MEMA, a shelter is opened at Maui Prep Academy <sup>70</sup>

22:30 Water loss is observed in Lahaina by firefighters trying to fight fires due to power outages pumping water into the system and water leaking out of burned pipes <sup>71</sup>

22:30 An evacuation order is issued to Ainakula according to residents <sup>72</sup>

**The acting Governor issues an emergency proclamation about Hurricane Dora** <sup>73</sup>

The Hawaiian Tourism Authority asks all visitors to leave Maui <sup>74</sup>

August 9, 2023

According to Maui County, 911 service in West Maui is not available <sup>75</sup>

00:20 According to the MEMA, an evacuation order is issued mauka (uphill) of Pi'ilani Highway up to Maui Meadows, Kīhei <sup>76</sup>

00:23 According to the MEMA, an evacuation order is issued for Upper Kimo Road in Kula <sup>77</sup>

00:44 According to the MEMA, the Kīhei Community Center shelter in Kīhei is closed as a precautionary measure. Inhabitants are are relocated <sup>78</sup>

01:01 In Kula, winds slowed according to security camera footage. This allows the fire department to contain the Kula Fire <sup>79</sup>

01:44 According to the MEMA, an evacuation order is issued for Ka'anapali Golf Estates including Kaulapa Loop, Pu'u Anoano St, Hakui Loop, and Wekio Place <sup>80</sup>

02:31 According to the MEMA, extensive road closures are in place <sup>81</sup>

**03:16 A Red Flag Warning is issued by the MEMA <sup>82</sup>**

03:23 The Red Flag Warning is downgraded to a Wind Advisory by the MEMA <sup>83</sup>

03:24 Police are still evacuating individuals from burn areas <sup>84</sup>

08:00 First fatality located and confirmed by the Maui Police Department <sup>85</sup>

12:40 In response to the Pūlehu Fire, an evacuation is ordered for Holopuni, Pūlehu , Lipoa to Maui Meadows and Ohukai subdivision in Kīhei <sup>86</sup>

14:36 Hawai'i Telcom announces they have communication loss in Maui County <sup>87</sup>

04:39 According to the HI DOT, approximately 1,800 people sheltered in place overnight at the Kahului Airport (OGG) with state highways still closed in some areas <sup>88</sup>

The Governor extends the state of emergency to all counties and air travel to Maui is discouraged <sup>89</sup>

In Kula, community members unearth red hot stones that cause hotspot ignition from underground according to resident reports <sup>90</sup>

According to the Maui County Fire Department in Kula, hotspots remain underground with occasional flareups requiring community monitoring vegetation burning underground smoldering over 100 good intent calls during smoldering period to present and 72 burning calls <sup>91</sup>

According to resident reports, water pressure returns to some parts of Kula. Residents heard power outage and pumps outages occurred as well as depressurization from burnt lines. Unclear when water was restored and how. <sup>92</sup>

August 10, 2023

The Maui Mayor makes televised address to the communities impacted <sup>93</sup>

11:56 According to the MEMA, a Family Assistance Center is opened in Kahului to help those search for missing persons impacted by the fires <sup>94</sup>

President Biden issues a federal disaster declaration <sup>95</sup>

An inter-island flotilla of boats delivers supplies to Lahaina because the roadway access to West Maui is limited <sup>96</sup>

For hygiene and hydration purposes, some Kula community members bathe in and drink yellow drinking water according to Kula residents <sup>97</sup>

August 11, 2023

According to the HI Department of Land and Natural Resources, the Olinda Fire is 85% contained <sup>98</sup>

**Unsafe Water Alerts (USW) are issued by the Maui County Department of Water Supply for the Upper Kula and Lahaina Public Water Systems and are posted on the MauiCounty.gov website** <sup>99</sup>

13:17 Maui County announces deployment of their CERT (Community Emergency Response Team) <sup>100</sup>

According to the HI Department of Health (DOH), the FEMA assigns the U.S. EPA with the mission assignment to survey, remove, and dispose of hazardous materials on properties affected by the wildfires in Maui. This mission assignment is referred to as Phase 1. <sup>101</sup>

August 13, 2023

**New maps of Unsafe Water Advisories are created and posted by Maui County Department of Water Supply on the MauiCounty.gov website** <sup>102</sup>

A national news report about the lack of water and dry fire hydrants for fire-fighting in Lahaina during the emergency response. Homeowners forced to fight fires with pools, hoses, and buckets <sup>103</sup>

The Kula Fire (also reported as the Upcountry Fire) is 60% contained <sup>104</sup>

More than 46,000 tourists left the island since the event <sup>105</sup>

August 14, 2023

The Maui Police Department suspend the placard program for West Maui travel <sup>106</sup>

**According to the HI DOH, the FIRST DRINKING WATER SAMPLES ARE COLLECTED: Maui Department of Water Supply collects the first drinking water samples from their Upper Kula and Lahaina Public Water Systems** <sup>107</sup>

Search and rescue continues for survivors of the Lahaina Fire <sup>108</sup>

August 15, 2023

**According to the HI DOH, the FIRST DRINKING WATER SAMPLES ARE ANALYZED: Hawai'i DOH chemically analyzed drinking water samples from Maui County and obtained chemical results** <sup>109</sup>

Maui County reports the containment status of the multiple fires:

Kula Fire, 75% contained, 678 acres with hotspots in gulches;

Lahaina Fire, 85% contained 2170 acres with no active threats;

Pūlehu /Kīhei Fire, 100% contained with no active threats;

Pu'ukoli'i/Ka'anapali Fire, extinguished 8/12 and remains extinguished. <sup>110</sup>

According to Maui County, the road opens to Lahaina for the first time since the fire <sup>111</sup>

According to Maui County, the first confirmed victims of the wildfires are announced <sup>112</sup>

August 16, 2023

The UH begins collecting drinking water samples at homes in Kula <sup>113</sup>

August 17, 2023

National news reports are published on ash, debris, chemical exposure, and health impact concerns for residents returning to the impacted areas <sup>114</sup>

August 18, 2023

The Maui County emergency manager resigns <sup>115</sup>

**THIS STUDY: The Purdue University disaster response team arrives in Honolulu and teams up with the University of Hawai'i experts already working in Hawai'i. The University of Hawai'i hosts a wildfire technical webinar about drinking water contamination.** <sup>116</sup>

August 19, 2023

**THIS STUDY: The Purdue University team arrives in Maui and begins this Maui household survey** <sup>117</sup>

**EXPANDED AREA: Maui County expands the Unsafe Water Alert area in Lahaina based on concerns that contaminated water might be outside the initial Unsafe Water Alert advisory area** <sup>118</sup>

August 20, 2023

A national news report is published that indicates after some prior US wildfires, in-home water filters were incapable of making the contaminated drinking water safe <sup>119</sup>

August 21, 2023

President Biden visits Maui<sup>120</sup>

**The University of Hawai'i launches their Drinking Water Information Hub to serve as a community information resource and to other relevant sources of information** <sup>121</sup>

August 22, 2023

**Purdue University, University of Hawai'i, Robby Seeger of EpicSwim, and experts from Paradise and Santa Rosa, California Louisville and Superior, Colorado meet with the Maui Department of Water Supply to provide drinking water system disaster response technical assistance** <sup>122</sup>

Some shelters are closed and persons in those shelters are moved to temporary housing <sup>123</sup>

A helicopter is deployed to work on hot spots in response to the Kula Fire and Olinda Fire<sup>124</sup>

Maui County reports the containment status of the multiple fires:

Olinda Fire, 85% contained. Estimated 1,081 acres;

Kula fire, 85% contained. Extinguishing hot spots in the Kula fire using hand crews and a helicopter. Fire activity is mostly located in hard-to-reach gulches. Flareups and reports of smoke have been well within the burn area, and have not posed any threat to public safety or fire expansion. Estimated 202 acres

Lahaina Fire, 100% contained. Estimated 2,170 acres. <sup>124</sup>

Maui County reports that King Kekaulike High School reopens in Kula <sup>124</sup>

An hourly Maui Bus from Lahaina to Kahului is put in place <sup>124</sup>

August 23, 2023

Maui County reports that the U.S. EPA begins hazardous materials removal in Kula <sup>125</sup>

**The Hawai'i Governor publicly asks tourists to return to Maui** <sup>126</sup>

**August 24, 2023**

National news reports indicate that some Lahaina residents who did not evacuate have no power, donations are locally organized, some residents complain about breathing problems if breathing the air for "5 minutes" <sup>127</sup>



**Purdue University, and other experts from Paradise, California, and Louisville, Colorado meet with Native Hawaiian households to provide advice on response and recovery in the context of insurance, government reimbursements, and water system damage assessment practices and recovery** <sup>128</sup>

**PUBLIC MEETING: The first public meeting with the Maui County Department of Water Supply and its customers is held in Kula. Elected leaders (Maui Mayor Bissen, Vice-Chair Councilwoman Yuki Lei Sigumura), Upcountry Strong/ Kula Hub (Tim Lara), Kula Lodge Team, American Red Cross, FEMA, Maui County Environmental Management, USEPA, HI DOH, and drinking water experts from Purdue University, Paradise California (site of the 2018 Camp Fire) and Louisville Colorado (site of the 2021 Marshall Fire) participate.**

<https://cloud.castus.tv/vod/akaku/video/64e848a9e64143000890d1ad?page=HOME>

<sup>129</sup>

**FIRST TEST RESULTS RELEASED: For the first time, the Maui County Department of Water Supply releases drinking water chemical test results (27 samples) from the Upper Kula and Lahaina public water systems. Samples were collected August 14, six days after the evacuation. Benzene and total xylenes were some of the VOCs detected**

<sup>130</sup>

For the first time, the Maui Department of Water Supply makes the first drinking water chemical testing results from Upper Kula and Lahaina public water systems publicly available <sup>131</sup>

Maui County provides private home testing information including phone numbers for Aecos Laboratory and Food Quality Labs. Maui County recommends homeowners ask for the "VOC Test Panel" <sup>132</sup>

Local news organization reports that a Kula resident mentions that with communications down her family was unaware the water system was unsafe, and friends and family were how she found out. She recommends written notices be sent when communications are down or spotty. <sup>133</sup>

August 25, 2023

**The new MEMA Director is announced** <sup>134</sup>

August 26, 2023

14:34 According to the MEMA, firefighters respond to Kaanapali Hillside from Anapuni Loop to West Mahipulu, Ka'anapali <sup>135</sup>

According to the MEMA, the Ka'anapali Fire evacuation order is lifted <sup>136</sup>

August 27, 2023

**THIS STUDY: Purdue University, University of Hawai'i, and Louisville Colorado experts conduct inspection of agricultural water systems at the request of the Hawai'i Department of Agriculture in and around the burn area** <sup>137</sup>

The Hawai'i DOH issues a factsheet about VOCs in drinking water, then updates the sheet in September 2023 <sup>138</sup>

August 28, 2023

The Governor announces that, at this 20 day mark, the search for survivors ends <sup>139</sup>

August 29, 2023

Schools in Lahaina remain closed since the fire <sup>140</sup>

Maui County delivers solar showers to Upcountry Unsafe Water Alert areas <sup>141</sup>

National news report published that the search for fire victims on land ends, now moves to nearshore waters <sup>142</sup>

September 5, 2023

Maui County announces that solar showers are being made available to residents in the Upcountry Unsafe Water Alert areas <sup>143</sup>

September 7, 2023

According to Maui County, the number of potable water tanker sites is reduced to two locations in Kula <sup>144</sup>

Filipinos in Lahaina say they've been overlooked in wildfire response <sup>145</sup>

September 9, 2023

Maui County announces a reminder that USW alert remains in effect for the Upper Kula public water system <sup>146</sup>

September 11, 2023

**Hawai'i DOH announces that toluene was detected in the Upper Kula public water system <sup>147</sup>**

September 12, 2023

**Maui County removes a portion of Upper Kula public water system from the Unsafe Water Alert advisory <sup>148</sup>**

The HI DOH releases air testing results for Lahaina and Upcountry for the first time <sup>149</sup>

September 13, 2023

Maui County warns that sewer service remains inactive since the wildfires for many properties in the fire impacted areas and that toilet flushing and other activities should not be conducted. Lift stations and power systems were damaged. <sup>150</sup>

September 17, 2023

**The UH begins returning drinking water results to homeowners <sup>151</sup>**

September 19, 2023

CWRM Posts an update on water resources in the Lahaina Aquifer Sector Area <sup>152</sup>

September 20, 2023

According to Maui County, the Olinda Fire is 90% contained. Estimated 1,081 acres. <sup>153</sup>

According to Maui County, the Kula Fire is 96% contained. Estimated 202 acres <sup>153</sup>

According to Maui County, the Lahaina Fire is 100% contained. Estimated 2,170 acres <sup>153</sup>

September 23, 2023

Lahaina residents begin to be allowed to return to their properties for supervised visits <sup>154</sup>  
According to Maui County, the Lauiniupoko beach park opens <sup>155</sup>

September 25, 2023

**According to Maui County, the first phase of residential reentry in Lahaina begins** <sup>156</sup>

According to Maui County, the Olinda Fire is 95% contained. Estimated 1,081 acres <sup>157</sup>

According to Maui County, the Kula Fire is 96% contained. Estimated 202 acres <sup>157</sup>

According to Maui County the Lahaina Fire is 100% contained. Estimated 2,170 acres <sup>157</sup>

September 26, 2023

The HI Department of Education announces that school begins October 16 in Lahaina, the first day back since the fire in August <sup>158</sup>

September 27, 2023

The HI DOH revised and reissued a fact sheet about how residents can protect themselves from wildfire debris hazards <sup>159</sup>

October 6, 2023

Maui County announces that a portion of Upper Kula and Lahaina removed from Unsafe Water Alert advisory <sup>160</sup>

October 7, 2023

According to the HI DOH, phased reopening begins for tourism on the west side <sup>161</sup>

October 9, 2023

Maui County approves the use of Soiltac for wildfire impact areas <sup>162</sup>

Maui County announces that a portion of Upper Kula and Lahaina public water systems are removed from Unsafe Water Alert advisory <sup>163</sup>

October 12, 2023

Maui County proposes three billing categories for drinking water customers in the fire impact areas <sup>164</sup>

October 13, 2023

Maui County removes Upper Kula public water system area UK3 from the unsafe water advisory <sup>165</sup>

October 15, 2023

The Hawai'i DOH releases results of Kula ash and debris chemical testing <sup>166</sup>

October 18, 2023

The Hawai'i DOH revised and reissued a factsheet about wildfire ash health risks <sup>167</sup>

October 27, 2023

Maui County removes water meters from burned homes <sup>168</sup>

October 31, 2023

**Maui County removes the Unsafe Water Advisory lifted for all areas of Upper Kula Water System.** USW alerts still in place for parts of the Lahaina public water system <sup>169</sup>

November 3, 2023

According to the U.S. EPA, hazardous material removal begins in the Lahaina impact area<sup>170</sup>

November 5, 2023

The MEMA issues a new red flag warning <sup>171</sup>

November 16, 2023

Maui County announces that the Lahaina underground parking garage flooded since August wildfires begins to be drained <sup>172</sup>

November 21, 2023

Maui County announces that a portion of the Lahaina public water system removed from Unsafe Water Alert advisory <sup>173</sup>

November 29, 2023

Maui County asks Lahaina customers within and near the burn zone to reduce toilet flushing, bathing, washing clothes and cleaning dishes <sup>174</sup>

November 30, 2023

**Maui County experiences the first significant rainfall event since the wildfires** <sup>175</sup>

December 1, 2023

The U.S. EPA completes removal of hazardous materials for Phase 1 in ALL wildfire impacted areas <sup>176</sup>

December 10, 2023

The HI DOH releases results of Lahaina ash and debris chemical testing <sup>177</sup>

December 12, 2023

According to Maui County, all zones now reopened in Lahaina <sup>178</sup>

December 13, 2023

More than 6,200 residents displaced by the wildfires, comprising 2,623 households, remain spread across 33 hotels and condominiums <sup>179</sup>

December 14, 2023

Maui County announces that a portion of the Lahaina public water system is removed from Unsafe Water Alert advisory area <sup>180</sup>

January 5, 2024

The Governor extends the emergency proclamation <sup>181</sup>

January 18, 2024

**The first property impacted by the Lahaina fire is cleared of debris** <sup>182</sup>

January 19, 2024

Maui County announces that a portion of the Lahaina public water system is removed from the Unsafe Water Alert advisory area <sup>183</sup>

January 23, 2024

The HI DOH announces increased air quality monitoring during debris removal <sup>184</sup>

February 16, 2024

Maui county announces portions of the Lahaina public water system are removed from Unsafe Water Alert advisory area <sup>185</sup>

More than 2,700 people participate in county surveys on possible permanent disposal sites for toxic debris <sup>186</sup>

March 5

Recent work indicates that USEPA oversaw 17,248 feet of sewer line inspections. First, local contractors cleared debris such as sediment, rocks (small and large), rags and oil and grease from the lines. After clearing, a robotic camera was lowered into the lines to assess conditions. To date, USEPA has cleared and inspected 69,582 feet of sewer line during the daytime. To date, a total of 86,830 feet of sewer lines has been cleared and inspected. <sup>187</sup>

**Table SI-1. Census Data for Kula and Lahaina, Hawai‘i**

| <b>US Census Information</b>                    | <b>Kula</b> | <b>Lahaina</b> | <b>Maui County</b> |
|-------------------------------------------------|-------------|----------------|--------------------|
| <b>Population (2020)</b>                        | 6,942       | 12,702         | 164,754            |
| <b>Population per square mile (2020)</b>        | 201         | 1632.2         | 141.8              |
| <b>Age and Sex, %</b>                           |             |                |                    |
| Persons under 5 years                           | 4.1         | 7.6            | 5.3                |
| Persons under 18 years                          | 20.6        | 22.9           | 20.9               |
| Persons 65 years and over                       | 25.4        | 16.7           | 20.7               |
| Female persons                                  | 52          | 49.2           | 50.1               |
| <b>Race and Hispanic Origin, %</b>              |             |                |                    |
| White                                           | 55.2        | 26.8           | 34.6               |
| Black or African American                       | 0           | 0.1            | 0.9                |
| American Indian and Alaska Native               | 0.3         | 0.3            | 0.6                |
| Asian                                           | 19.9        | 37.9           | 28.6               |
| Native Hawaiian and Other Pacific Islander      | 5           | 8.5            | 10.4               |
| Two or more races                               | 14          | 24.3           | 24.9               |
| Hispanic or Latino                              | 6.8         | 13.1           | 12                 |
| White alone, not Hispanic or Latino             | 51.4        | 23.5           | 29.8               |
| <b>Housing</b>                                  |             |                |                    |
| Owner-occupied housing unit rate, % (2018-2022) | 67.8        | 51.8           | 65.3               |
| Median Value of owner-occupied housing units    | \$1,144,00  | 803,000        | 800,100            |
| <b>Families and Living Arrangements</b>         |             |                |                    |
| Households, % (2018-2022)                       | 2,480       | 3,562          | 54,728             |
| Persons per household                           | 2.64        | 3.53           | 2.96               |
| <b>Language, Education, and Income</b>          |             |                |                    |
| Language other than English spoken at home, %   | 13          | 37.2           | 22.1               |
| Bachelor's degree or higher, %                  | 39.1        | 24.8           | 30.1               |
| Median household income (2022)                  | \$93,452    | \$83,443       | \$95,379           |
| Persons in poverty, %                           | 11.2        | 11.7           | 9                  |

Source:

<https://www.census.gov/quickfacts/fact/table/kulacdphawaii,mauicountyhawaii,lahainacdphawaii/PST045223?>

CDPs were for Kula and Lahaina and are census designated places

### SI-3. Survey Instrument

#### 1. PROPERTY CHARACTERISTICS

What is your name?

What is your email address (so we can send results)?

What is the address (so we can validate location)?

How many people from each category live in the home?

\_\_\_\_\_ Less than 1 year old

\_\_\_\_\_ 1 to 17 years old

\_\_\_\_\_ 18 to 64 years old

\_\_\_\_\_ 65+ years old

Do you own or rent the home?

Own       Rent       Other: \_\_\_\_\_

How long have you lived at the home in years?

Was your home damaged by the wildfire? If yes, please explain

Do you have home/renter's insurance?  Yes  No

#### 2. INCIDENT

Where were you when you learned about the fire?

From whom and how did you learn that there was a fire?

What day/time did you evacuate the area?

What day/time did you first visit/ return to your home?

Did your home lose power during or since the fire? If so, when and how long?

Did fire damage anything on your property? If so what?

#### 3. DRINKING WATER SOURCE AND SYSTEM

How is water provided to your home?

Water company       Private well

Private cistern       Other: \_\_\_\_\_

Before the fire, did you have drinking water treatment devices or systems installed at home?

Yes No

If yes, please explain \_\_\_\_\_

Since the fire, have you installed or purchased in-home drinking water treatment devices or systems?

Yes No If yes, please explain \_\_\_\_\_

After returning home, did you notice any changes with the water such as taste/odor/it's color/clarity? If yes, please describe

After returning home, did you notice low or no water pressure? If yes, please describe:

Is your home in a drinking water advisory/unsafe water alert area? Yes No

What day/time did you first find out about the alert?

How did you first find out about the alert?

Since you learned about the alert, have you used water from your plumbing? Yes No

If yes, for what activities?

If your home is not in the alert area or before it got issued, have you used water from your plumbing? Yes No

If yes, for what activities?

Since the fire, have you used bottled water at home due to drinking water concerns? If yes, for what activities?

Did you pay for this bottled water? Where did you obtain the bottled water?

Did you obtain emergency drinking water from "water buffalos" which are public water dispensing stations?

Yes No

Since the fire, have you flushed your plumbing (i.e., like run faucets, hose spigots)? If so, please explain.

#### **4. PROXIMITY TO DAMAGED OR DESTROYED BUILDINGS**

Approximately how far away from your home is a building that was damaged or destroyed by the fire?

Do you know someone whose building was damaged or destroyed by the fire? Yes No

#### **5. ADVICE AND SUPPORT**

Since the fire, who has provided you advice about your drinking water?



- A state agency or representative
- Maui County Health Department
- Department of Water Supply
- In-home water treatment company
- Water testing laboratory
- Other, please explain: \_\_\_\_\_

Which one do you most trust right now?

- A state agency or representative
- Maui County Health Department
- Department of Water Supply
- In-home water treatment company
- Water testing laboratory
- Other, please explain: \_\_\_\_\_

Who do you think is the most responsible for determining which water tests are needed after the fire for determining if the utility pipes are safe?

- The local water utility
- Maui County Health Department
- Hawai'i Department of Health (DOH)
- Other, please describe: \_\_\_\_\_

Who do you think is the most responsible for determining which water tests are needed after the fire for determining if the homeowner plumbing is safe?

- The homeowner
- Homeowner insurance company
- The local water utility
- Maui County Health Department
- Hawai'i Department of Health (DOH)
- Other, please describe: \_\_\_\_\_

Since the fire, have you conducted water testing? If yes, please explain (When? Who? For what? How many times?):

\_\_\_\_\_

## 6. IMPORTANT REMAINING HOME QUESTIONS

As of today, what (3 to 5) questions do you have about drinking water safety that you want answered?

What is your age? \_\_\_\_\_

Diagram of property water system

Building ID: \_\_\_\_\_

#### SI-4. SI File References

1. NOAA. Hurricane Dora named by the National Hurricane Center . *Hurricane DORA Advisory Archive (noaa.gov)*. [Online] [Cited: February 12, 2024.] <https://www.nhc.noaa.gov/archive/2023/DORA.shtml>.
2. Hawaii News Now. Red flag warning Issued by MEMA and HI EMA. *First Alert Weather Day : Red flag warning extended as Dora tracks west*. [Online] August 6, 2023. [Cited: February 12, 2024.] <https://www.hawaiinewsnow.com/2023/08/06/first-alert-high-wind-fire-watches-issued-ahead-dry-gusty-weather/>.
3. MEMA. High Wind Warning Downslope Leeward Maui. *Twitter @Maui\_EMA*. [Online] August 7, 2023. [Cited: February 12, 2024.] [https://twitter.com/Maui\\_EMA/status/1688727247124131840](https://twitter.com/Maui_EMA/status/1688727247124131840).
4. Maui News. County officials meet and partially activate the Emergency Operations Center in Wailuku; two MEMA staff stay overnight. *Mayor details county response in the early hours of wildfires*. [Online] September 1, 2023. [Cited: February 12, 2024.] <https://www.mauinews.com/news/local-news/2023/09/mayor-details-county-response-in-the-early-hours-of-wildfires/>.
5. Maui Electric. Moloka'i power outage due to downed power lines from high wind. *Twitter @MauiElectric*. [Online] August 7, 2023. [Cited: February 12, 2024.] <https://twitter.com/MauiElectric/status/1688774866357350400>.
6. Global News. Security Footage: The Olinda Fire began at the Bird Conservation Center. *Global News YouTube Channel*. [Online] August 16, 2023. [Cited: February 12, 2024.] <https://www.youtube.com/watch?v=qe8xsUlaYac>.
7. Washington Post. Fire first reported in Olinda, named the Olinda Fire. *Power lines likely caused Maui's first reported fire, video and data show*. [Online] August 16, 2023. [Cited: February 12, 2024.] <https://www.washingtonpost.com/climate-environment/2023/08/15/maui-fires-power-line-cause/>.
8. HECO, Shelee M. Kimura President and CEO. HECO received the first call of an outage and dispatched a troubleman. *Hawaiian Electric Company*. [Online] October 27, 2023. [Cited: February 12, 2024.] <chrome-extension://efaidnbmnnnibpcajpcgclefindmkaj/https://docs.house.gov/meetings/IF/IF02/20230928/116431/HHRG-118-IF02-Wstate-KimuraS-20230928-SD002.pdf>.
9. Maui Police Department. Evacuations begin in Olinda. *MPD's Preliminary After-Action Report*. [Online] August 8, 2023. [Cited: February 26, 2024.] [chrome-extension://efaidnbmnnnibpcajpcgclefindmkaj/https://selfreliancecentral.com/wp-content/uploads/2024/02/pre\\_aar.pdf](chrome-extension://efaidnbmnnnibpcajpcgclefindmkaj/https://selfreliancecentral.com/wp-content/uploads/2024/02/pre_aar.pdf).

10. —. Tree blocking Highway at 10400 Haleakala Highway. *MPD's Preliminary After-Action Report*. [Online] August 8, 2023. [Cited: February 26, 2024.] chrome-extension://efaidnbmnnnibpcajpcgclefindmkaj/https://selfreliancecentral.com/wp-content/uploads/2024/02/pre\_aar.pdf.
11. —. Officer injured in response to Olinda fire, transported to hospital. . *MPD's Preliminary After-Action Report* . [Online] August 8, 2023. [Cited: February 26, 2024.] chrome-extension://efaidnbmnnnibpcajpcgclefindmkaj/https://selfreliancecentral.com/wp-content/uploads/2024/02/pre\_aar.pdf.
12. Maui County. An evacuation order was issued for the Auli'i Drive area in response to the Olinda Fire. *Maui County*. [Online] August 8, 2023. [Cited: February 13, 2024.] <https://www.mauicounty.gov/CivicAlerts.aspx?AID=12621>.
13. MEMA. An evacuation order was issued for the Kula 200 area in response to the Olinda Fire. *Twitter @Maui\_EMA*. [Online] August 8, 2023. [Cited: February 13, 2024.] [https://twitter.com/Maui\\_EMA/status/1688917802286288898](https://twitter.com/Maui_EMA/status/1688917802286288898).
14. Maui County. Hanamu Road is evacuated in response to the Olinda Fire. *MauiCounty.gov*. [Online] August 8, 2023. [Cited: February 13, 2024.] <https://www.mauicounty.gov/CivicAlerts.aspx?AID=12621>.
15. Company, Shellee M. Kimura President and CEO of Hawaiian Electric. West Maui transmission line tripped offline automatically, requiring manual activation per Reclose Blocking Procedure. *HECO*. [Online] October 27, 2023. [Cited: February 13, 2024.] chrome-extension://efaidnbmnnnibpcajpcgclefindmkaj/https://docs.house.gov/meetings/IF/IF02/20230928/116431/HHRG-118-IF02-Wstate-KimuraS-20230928-SD002.pdf.
16. Maui Police Department. *MPD's Preliminary After-Action Report* . [Online] August 8, 2023. [Cited: February 26, 2024.] chrome-extension://efaidnbmnnnibpcajpcgclefindmkaj/https://selfreliancecentral.com/wp-content/uploads/2024/02/pre\_aar.pdf.
17. MEMA. An evacuation order is issued for multiple streets near King Kekaulike High School in response to the Olinda Fire. *Twitter @Maui\_EMA*. [Online] August 8, 2023. [Cited: February 13, 2024.] <https://docs.google.com/spreadsheets/d/1N2aYojG2J7vx-WcL05tF19GZO-TzvRb3DGSiXkNSqU8/edit#gid=0>.
18. Maui Electric. Power outages from Lahaina to Napili, Olinda to Piiholo, and Kamehameha Hwy Moloka'i are reported. *Twitter @MauiElectric*. [Online] August 8, 2023. [Cited: February 13, 2024.] <https://twitter.com/MauiElectric/status/1688945192563515392>.
19. —. Power is restored to Lahaina. *Twitter @MauiElectric*. [Online] August 8, 2023. [Cited: February 13, 2024.] <https://twitter.com/MauiElectric/status/1688949804980903936>.
20. Maui Police Department. Police evacuate 13000 block of Haleakala Highway. *MPD's Preliminary After-Action Report* . [Online] August 8, 2023. [Cited: February 26, 2024.] chrome-

extension://efaidnbmnnnibpcajpcgiclfndmkaj/https://selfreliancecentral.com/wp-content/uploads/2024/02/pre\_aar.pdf.

21. Maui News. Maui Mayor Bissen arrives at the Emergency Operations Center in Wailuku. *Mayor details county response in the early hours of wildfires*. [Online] September 1, 2023. [Cited: February 13, 2024.] <https://www.mauinews.com/news/local-news/2023/09/mayor-details-county-response-in-the-early-hours-of-wildfires/>.

22. Citizen Video by Shane Treu. Fire first reported in Lahaina, named the Lahaina Fire. *Global News*. [Online] August 16, 2023. [Cited: February 13, 2024.] <https://www.youtube.com/watch?v=qe8xsUlaYac>.

23. HECO, Shellee M. Kimura President and CEO. West Maui transmission line tripped offline automatically, requiring manual activation per Reclose Blocking Procedure. *Hawaiian Electric Company*. [Online] October 27, 2023. [Cited: February 13, 2024.] chrome-extension://efaidnbmnnnibpcajpcgiclfndmkaj/https://docs.house.gov/meetings/IF/IF02/20230928/116431/HHRG-118-IF02-Wstate-KimuraS-20230928-SD002.pdf.

24. Maui Police Department. MFD reporting pole #843 down on Makanoe Place. There is room to drive around. Requesting lines to be de-energized. *MPD's Preliminary After-Action Report*. [Online] August 8, 2023. [Cited: February 26, 2024.] chrome-extension://efaidnbmnnnibpcajpcgiclfndmkaj/https://selfreliancecentral.com/wp-content/uploads/2024/02/pre\_aar.pdf.

25. Maui County; CNN. The Lahaina Fire is reported to be 100% contained. [Online] August 18, 2023. [Cited: February 13, 2024.] <https://www.mauicounty.gov/CivicAlerts.aspx?AID=12622>; <https://www.cnn.com/interactive/2023/08/hawaii-wildfires-timeline-maui-lahaina-dg/index.html>.

26. Resident, Anonymous. Winds began increasing in Kula, Maui. Kula : Interviewed by Author, August 8, 2023.

27. Maui Electric. HECO is attempting to restore power to several thousand customers in West Maui and Upcountry. *Twitter @MauiElectric*. [Online] August 8, 2023. [Cited: February 13, 2024.] <https://twitter.com/MauiElectric/status/1688995644470411265>.

28. —. HECO addresses three main transmission lines down in Lahaina. *Twitter @MauiElectric*. [Online] August 8, 2023. [Cited: February 13, 2024.] <https://twitter.com/MauiElectric/status/1689004842415468544>.

29. —. HECO responded to downed power lines in Olinda to Piihola and first outages were reported in Kula. *Twitter @MauiElectric*. [Online] August 8, 2023. [Cited: February 13, 2024.] <https://twitter.com/MauiElectric/status/1689004882131394560>.

30. Resident, Anonymous. Powerline arcing witnessed above Kula Lodge in Upcountry. HWY 377 Kula : Interviewed by Author, August 8, 2023.

31. MEMA. Road closure on Lahainaluna Rd from Kelawea Street to Kuialua St. *Twitter @Maui\_EMA*. [Online] August 8, 2023. [Cited: February 13, 2024.] [https://twitter.com/Maui\\_EMA/status/1689018865542668288](https://twitter.com/Maui_EMA/status/1689018865542668288).
32. Residents, Kula. Fire first reported in Kula, named the Kula Fire: Single powerful gust that knocked down trees in several areas including the eucalyptus that landed on the powerline which shot sparks mauka into Kulalani Gulch starting Kula fire, neighbors called fire dep. Kula : Interviewed by Author, August 8, 2023.
33. Christopher Stankis, Public Information Officer Maui Fire and Public Safety. Fire department responds to Kulalani Gulch Kualono Place, The fire behaves erratically from the storm, not supposed to move downhill, wind intensity, not many timestamps due to the chaotic situation. Kula : Interviewed by Author, January 18, 2024.
34. Resident, Anonymous. Firefighters tell the Ainakula neighborhood to stand by for evacuation orders. Kula : Interviewed by Author, August 8, 2023.
35. Maui Police Department. Engine 14 unable to get through in Olinda due to downed power lines. *MPD's Preliminary After-Action Report*. [Online] August 8, 2023. [Cited: February 26, 2024.] [chrome-extension://efaidnbmnnnibpcajpcgiclfindmkaj/https://selfreliancecentral.com/wp-content/uploads/2024/02/pre\\_aar.pdf](chrome-extension://efaidnbmnnnibpcajpcgiclfindmkaj/https://selfreliancecentral.com/wp-content/uploads/2024/02/pre_aar.pdf).
36. National Weather Service. High wind and fire alerts are issued by the National Weather Service. *Twitter @NWSHonolulu*. [Online] August 8, 2023. [Cited: February 13, 2024.] <https://twitter.com/NWSHonolulu/status/1689040628599136256>.
37. Global News. Lahaina power poles sway in the wind courtesy of resident video. *Maui wildfire: Confusion, questions surround timeline of Lahaina fire*. [Online] August 16, 2023. [Cited: February 13, 2024.] <https://www.youtube.com/watch?v=qe8xsUlaYac>.
38. MEMA. Lahainaluna Road is reopened and the following road closures are in place. *Twitter @Maui\_EMA*. [Online] August 8, 2023. [Cited: February 13, 2024.] [https://twitter.com/Maui\\_EMA/status/1689053659072782336](https://twitter.com/Maui_EMA/status/1689053659072782336).
39. —. Shelters open at Hannibal Tavares and Lahaina Civic Center for displaced residents. *Twitter @Maui\_EMA*. [Online] August 8, 2023. [Cited: February 13, 2024.] [https://twitter.com/Maui\\_EMA/status/1689058277865426945](https://twitter.com/Maui_EMA/status/1689058277865426945).
40. —. Structural damage self reporting begins for Maui County. *Twitter @Maui\_EMA*. [Online] August 8, 2023. [Cited: February 13, 2024.] [https://twitter.com/Maui\\_EMA/status/1689072516566790144](https://twitter.com/Maui_EMA/status/1689072516566790144).
41. Maui Police Department. At approximately 2:50 p.m., the officer observed multiple utility poles breaking at their base and falling into the highway, obstructing multiple lanes. *MPD's Preliminary After-Action Report* . [Online] August 8, 2023. [Cited: February 26, 2024.] [chrome-extension://efaidnbmnnnibpcajpcgiclfindmkaj/https://selfreliancecentral.com/wp-content/uploads/2024/02/pre\\_aar.pdf](chrome-extension://efaidnbmnnnibpcajpcgiclfindmkaj/https://selfreliancecentral.com/wp-content/uploads/2024/02/pre_aar.pdf).

42. —. Fire reported on Lahainaluna Rd to MPD. *MPD's Preliminary After-Action Report* . [Online] August 8, 2023. [Cited: February 26, 2024.] [chrome-extension://efaidnbnmnibpcjpcglclefindmkaj/https://selfreliancecentral.com/wp-content/uploads/2024/02/pre\\_aar.pdf](chrome-extension://efaidnbnmnibpcjpcglclefindmkaj/https://selfreliancecentral.com/wp-content/uploads/2024/02/pre_aar.pdf).
43. MEMA. Pi'iholo and Olinda Road are evacuated in response to the Olinda Fire. *Twitter @Maui\_EMA*. [Online] August 8, 2023. [Cited: February 13, 2024.] [https://twitter.com/Maui\\_EMA/status/1689092269759221761](https://twitter.com/Maui_EMA/status/1689092269759221761).
44. HI DOT. Haleakala Hwy closed between Kulalani Dr. and Kualono Pl. due to brush fire. *Twitter @DOTHawaii*. [Online] August 8, 2023. [Cited: February 13, 2024.] <https://twitter.com/DOTHawaii/status/1689086036104957952>.
45. Global News. The brushfire that was contained in Lahaina reignites, and the Lahaina Fire begins. *Shane Treu Resident Cellphone Footage, Jayson Duke Resident Cellphone Footage*. [Online] August 16, 2023. [Cited: February 13, 2024.] <https://www.youtube.com/watch?v=qe8xsUlaYac>.
46. Maui County; CNN;. Shelter in place advisory, evacuation, and road closure. [Online] August 8, 2023. [Cited: February 13, 2024.] <https://www.mauicounty.gov/CivicAlerts.aspx?AID=1263>; <https://www.cnn.com/interactive/2023/08/hawaii-wildfires-timeline-maui-lahaina-dg/index.html>.
47. MEMA. A High Wind Warning is issued with localized gusts over 65 MPH. *Twitter @Maui\_EMA*. [Online] August 8, 2023. [Cited: February 13, 2024.] [https://twitter.com/Maui\\_EMA/status/1689089128028418048](https://twitter.com/Maui_EMA/status/1689089128028418048).
48. Office of the Governor; CNN. Acting governor Lt. Gov Sylvia Luke issues an emergency proclamation to activate assistance from State National Guard. [Online] August 8, 2023. [Cited: February 13, 2024.] <https://www.cnn.com/interactive/2023/08/hawaii-wildfires-timeline-maui-lahaina-dg/index.html>; <https://governor.hawaii.gov/newsroom/office-of-the-governor-news-release-emergency-proclamation-for-hurricane-dora-wildfires/>.
49. Maui Electric. HECO activates their incident management team. *Twitter @MauiElectric*. [Online] August 8, 2023. [Cited: February 13, 2024.] <https://twitter.com/MauiElectric/status/1689093099044163584>.
50. —. HECO acknowledges 600 upcountry customers are without 30 spans of power lines. *Twitter @MauiElectric*. [Online] August 8, 2023. [Cited: February 13, 2024.] <https://twitter.com/MauiElectric/status/1689093348642922496>.
51. —. HECO reports that 12,400 customers are offline and there are more than 30 downed poles on the west side of Maui. *Twitter @MauiElectric*. [Online] August 8, 2023. [Cited: February 13, 2024.] <https://twitter.com/MauiElectric/status/1689093239603621888>.
52. MEMA. An evacuation is ordered for Kulalani Circle and Kulalani Drive. *Twitter @Maui\_EMA*. [Online] August 8, 2023. [Cited: February 13, 2024.] [https://twitter.com/Maui\\_EMA/status/1689098432831684608](https://twitter.com/Maui_EMA/status/1689098432831684608).

53. —. An evacuation is ordered for the Lahaina Kelaweia Mauka subdivision. *Twitter @Maui\_EMA*. [Online] August 8, 2023. [Cited: February 13, 2024.] [https://twitter.com/Maui\\_EMA/status/1689100792312242176](https://twitter.com/Maui_EMA/status/1689100792312242176).
54. —. Hokiokio power lines are cleared and opened to the bypass to let cars out of Lahaina. *Twitter @Maui\_EMA*. [Online] August 8, 2023. [Cited: February 13, 2024.] [https://twitter.com/Maui\\_EMA/status/1689114693385015296](https://twitter.com/Maui_EMA/status/1689114693385015296).
55. —. There is a road closure of Lahaina Bypass, Kahakuloa is now restricted to Kahakuloa residents only. *Twitter @Maui\_EMA*. [Online] August 8, 2023. [Cited: February 13, 2024.] [https://twitter.com/Maui\\_EMA/status/1689110908445106176](https://twitter.com/Maui_EMA/status/1689110908445106176).
56. Noah Tomkinson Resident Cell Phone Footage. Lahaina residents jumped into ocean water as flames approached Front Street. *7News Australia*. [Online] August 8, 2023. [Cited: February 13, 2024.] <https://youtube.com/shorts/9BfqOHqMrjM?si=YIFOdSB9zBSWnoyl>.
57. Maui Police Department. Pulehu Fire begins off of pulehu road heading toward Kihei. *MPD's Preliminary After-Action Report*. [Online] August 8, 2023. [Cited: February 26, 2024.] [chrome-extension://efaidnbmnnnibpajpcgiclfndmkaj/https://selfreliancecentral.com/wp-content/uploads/2024/02/pre\\_aar.pdf](chrome-extension://efaidnbmnnnibpajpcgiclfndmkaj/https://selfreliancecentral.com/wp-content/uploads/2024/02/pre_aar.pdf).
58. Maui News. Maui County Mayor Bissen signs an emergency proclamation. *Mayor details county response in the early hours of wildfires*. [Online] September 1, 2023. [Cited: February 13, 2024.] <https://www.mauinews.com/news/local-news/2023/09/mayor-details-county-response-in-the-early-hours-of-wildfires/>.
59. Resident, Anonymous. Residents on Olinda Road are trapped by fallen trees, fire approaching and burning homes, then winds switch direction, sparing homes. Olinda : Interviewed by Author, August 8, 2023.
60. Christopher Stankis, Public Information Officer County of Maui Fire and Public Safety. Water is seen pouring out of burned structures. Kula : Interviewed by Author, January 18, 2024.
61. MEMA. No power at shelters Hannibal Tavares and Kihei Community Center. *Twitter @Maui\_EMA*. [Online] August 8, 2023. [Cited: February 13, 2024.] [https://twitter.com/Maui\\_EMA/status/1689174532312170496](https://twitter.com/Maui_EMA/status/1689174532312170496).
62. Maui Police Department. Police evacuate residents on Kaiwahine Street. *MPD's Preliminary After-Action Report*. [Online] August 8, 2023. [Cited: February 26, 2024.] [chrome-extension://efaidnbmnnnibpajpcgiclfndmkaj/https://selfreliancecentral.com/wp-content/uploads/2024/02/pre\\_aar.pdf](chrome-extension://efaidnbmnnnibpajpcgiclfndmkaj/https://selfreliancecentral.com/wp-content/uploads/2024/02/pre_aar.pdf).
63. —. Kihei officers escorting buses to and from Coast Guard Station Maui with ocean evacuees. *MPD's Preliminary After-Action Report*. [Online] August 8, 2023. [Cited: February 26, 2024.] [chrome-extension://efaidnbmnnnibpajpcgiclfndmkaj/https://selfreliancecentral.com/wp-content/uploads/2024/02/pre\\_aar.pdf](chrome-extension://efaidnbmnnnibpajpcgiclfndmkaj/https://selfreliancecentral.com/wp-content/uploads/2024/02/pre_aar.pdf).



64. —. Police evacuate Kula Lodge area. *MPD's Preliminary After-Action Report* . [Online] August 8, 2023. [Cited: February 26, 2024.] chrome-extension://efaidnbmnnnibpcajpcgclefindmkaj/https://selfreliancecentral.com/wp-content/uploads/2024/02/pre\_aar.pdf.
65. HI DOT. State routes closed in Lahaina, Kihei, and Makawao. *Twitter @DOTHawaii*. [Online] August 8, 2023. [Cited: February 13, 2024.] <https://twitter.com/DOTHawaii/status/1689181779851354112>.
66. Maui County. Water buffaloes are placed at Kula Fire Station, Kula Community Center, Rice Park and Crater Road – Hydrant 373. *Mayor Bissen issues an emergency proclamation in response to fires*. [Online] <https://www.mauicounty.gov/CivicAlerts.aspx?AID=12639>.
67. Residents, Anonymous. Water loss is observed in Kula and community members begin to form alliances with water storage tanks and fire hoses to assist the fire department. Kula : Interviewed by Author, August 8, 2023.
68. MEMA. Shelter opened at Maui High School. *Twitter @Maui\_EMA*. [Online] August 8, 2023. [Cited: February 15, 2024.] [https://twitter.com/Maui\\_EMA/status/1689186267257610240](https://twitter.com/Maui_EMA/status/1689186267257610240).
69. Maui Police Department. Police coordinating with Kaanapali hotels and preparing for possible mass evacuations. . *MPD's Preliminary After-Action Report* . [Online] August 8, 2023. [Cited: February 27, 2025.] chrome-extension://efaidnbmnnnibpcajpcgclefindmkaj/https://selfreliancecentral.com/wp-content/uploads/2024/02/pre\_aar.pdf.
70. MEMA. Shelter opened at Maui Prep Academy. *Twitter @Maui\_EMA*. [Online] August 8, 2023. [Cited: February 15, 2024.] <https://docs.google.com/document/d/1bdalVBC6LLFB8ehk-GXScP3E4JCgbZnLNIisfRWVzLI/edit>.
71. Seattle Times. Water loss is observed in Lahaina by firefighters trying to fight fires due to power outages pumping water into the system and water leaking out of burned pipes. *As inferno grew, Lahaina's water system collapsed*. [Online] August 8, 2023. [Cited: February 15, 2024.] <https://www.seattletimes.com/nation-world/as-inferno-grew-lahainas-water-system-collapsed/>.
72. Residents, Anonymous. An evacuation order is issued to Ainakula. Kula : Interviewed by Author, August 8, 2023.
73. State of Hawaii Office of the Governor. State of Hawaii Emergency Proclamation Issued by acting Governor of Hawaii about Hurricane Dora. *Proclamation Relating to Wildfires*. [Online] August 9, 2023. [Cited: February 15, 2024.] chrome-extension://efaidnbmnnnibpcajpcgclefindmkaj/https://governor.hawaii.gov/wp-content/uploads/2023/08/2307199-1.pdf.
74. Beat of Hawaii. The Hawaiian Tourism Authority asks all visitors to leave Maui. *Hawaii Asks All Visitors To Leave Maui*. [Online] August 9, 2023. [Cited: February 15, 2024.] <https://beatofhawaii.com/hawaii-asks-all-visitors-to-leave-maui/>.

75. Maui County. 911 service in West Maui is not available. [Online] August 9, 2023. [Cited: February 15, 2024.] <https://www.mauicounty.gov/CivicAlerts.aspx?AID=12640>.
76. MEMA. An evacuation order is issued mauka of Pi'ilani HWY up to Maui Meadows. *Twitter @Maui\_EMA*. [Online] August 9, 2023. [https://twitter.com/Maui\\_EMA/status/1689220015445430272](https://twitter.com/Maui_EMA/status/1689220015445430272).
77. —. An evacuation order is issued for Upper Kimo Road. [Online] Twitter @Maui\_EMA, August 9, 2023. [Cited: February 15, 2024.] [https://twitter.com/Maui\\_EMA/status/1689220918860771328](https://twitter.com/Maui_EMA/status/1689220918860771328).
78. MEMA; Wunderground. The Kihei Community Center shelter is closed as a precautionary measure. Inhabitants are being relocated. *Twitter @Maui\_EMA; Deadly Maui Fires Destroy Lahaina Town*. [Online] August 9, 2023. [Cited: February 15, 2024.] [https://twitter.com/Maui\\_EMA/status/1689226056954445824](https://twitter.com/Maui_EMA/status/1689226056954445824); <https://www.wunderground.com/article/news/news/2023-08-09-hawaii-wildfires-maui-lahaina-hurricane-dora>.
79. Martens, Dave. Security Camera from Ainakula Rd. *YouTube*. [Online] August 22, 2023. [Cited: February 15, 2024.] <https://www.youtube.com/watch?v=663kucbxj4k>.
80. MEMA. An evacuation order is issued for Ka'anapali Golf Estates including Kaulapa Loop, Pu'u Anoano St, Hakui Loop, and Wekio Place. *Twitter @Maui\_EMA*. [Online] August 9, 2023. [Cited: February 15, 2024.] [https://twitter.com/Maui\\_EMA/status/1689241326985105408](https://twitter.com/Maui_EMA/status/1689241326985105408).
81. —. Extensive road closures are in place. *Twitter @Maui\_EMA*. [Online] August 9, 2023. [Cited: February 15, 2024.] [https://twitter.com/Maui\\_EMA/status/1689252996410982400](https://twitter.com/Maui_EMA/status/1689252996410982400).
82. —. Red Flag Warning Issued by MEMA. *Twitter @Maui\_EMA*. [Online] August 9, 2023. [Cited: February 15, 2024.] [https://twitter.com/Maui\\_EMA/status/1689264461641875456](https://twitter.com/Maui_EMA/status/1689264461641875456).
83. —. Red flag warning downgraded to a wind advisory by MEMA. *Twitter @Maui\_EMA*. [Online] August 9, 2023. [Cited: February 16, 2024.] [https://twitter.com/Maui\\_EMA/status/1689266090730496000](https://twitter.com/Maui_EMA/status/1689266090730496000).
84. Maui Police Department. Police still evacuating individuals from burn areas. *MPD's Preliminary After-Action Report*. [Online] August 8, 2023. [Cited: February 27, 2024.] [chrome-extension://efaidnbmnnnibpcajpcgclefindmkaj/https://selfreliancecentral.com/wp-content/uploads/2024/02/pre\\_aar.pdf](chrome-extension://efaidnbmnnnibpcajpcgclefindmkaj/https://selfreliancecentral.com/wp-content/uploads/2024/02/pre_aar.pdf).
85. —. First Fatality located and confirmed. *MPD's Preliminary After-Action Report*. [Online] August 8, 2023. [Cited: February 27, 2024.] [chrome-extension://efaidnbmnnnibpcajpcgclefindmkaj/https://selfreliancecentral.com/wp-content/uploads/2024/02/pre\\_aar.pdf](chrome-extension://efaidnbmnnnibpcajpcgclefindmkaj/https://selfreliancecentral.com/wp-content/uploads/2024/02/pre_aar.pdf).
86. Maui County. In response to the Pulehu Fire, an evacuation is ordered for Holopuni, Pulehu, Lipoa to Maui Meadows and Ohukai subdivision. *Lahaina and Upcountry Maui Fires Combined*

*Update No. 3, 12:40 p.m.* [Online] August 9, 2023. [Cited: February 16, 2024.] <https://www.mauicounty.gov/CivicAlerts.aspx?AID=12641>.

87. Maui Now. Hawai'i Telcom announces they have communication loss. *Hawaiian Telcom customers on Maui affected by intermittent service outages.* [Online] August 9, 2023. [Cited: February 16, 2024.] <https://mauinow.com/2023/08/09/hawaiian-telcom-customers-on-maui-affected-by-intermittent-service-outages/>.

88. HI DOT. Approximately 1800 people sheltered in place overnight at the Kahului Airport (OGG) with state highways still closed in some areas. *Twitter @DOTHawaii.* [Online] August 9, 2023. [Cited: February 16, 2024.] <https://twitter.com/DOTHawaii/status/1689285226223067136>.

89. State of Emergency extended to all counties and airtravel to Maui is discouraged. *State of Hawaii Governor.* [Online] August 9, 2023. [Cited: February 16, 2024.] <https://governor.hawaii.gov/newsroom/office-of-the-governor-news-release-emergency-proclamation-for-maui-air-travel-and-hurricane-dora/>.

90. Residents, Anonymous. Community begins unearthing red hot stones that cause hotspot ignition from underground. Kula : Interviewed by Author, August 9, 2023.

91. Christopher Stankis, Maui Fire and Public Safety Public Information Officer. In Kula, hotspots remain underground with occasional flare ups requiring community monitoring vegetation burning underground, smoldering over 100 good intent calls during the smoldering period to present and 72 burning calls. Kula : Interviewed by Author, January 18, 2024.

92. Resident, Anonymous. Water turned back on in Kula. Kula : Interviewed by Author, August 9, 2023.

93. County of Maui. The Maui Mayor makes televised address to the communities impacted. *Mayor Richard Bissen offers a public message in light of recent tragedies.* [Online] August 9, 2023. [Cited: February 16, 2024.] <https://www.facebook.com/watch/?v=1353705898828259>.

94. MEMA. A Family Assistance Center is opened in Kahului to help those searching for missing persons impacted by the fires. *Twitter @Maui\_EMA.* [Online] August 9, 2023. [Cited: February 16, 2024.] [https://twitter.com/Maui\\_EMA/status/1689757750279262208](https://twitter.com/Maui_EMA/status/1689757750279262208).

95. The White House. President Biden issues a federal disaster declaration. *President Joseph R. Biden, Jr. Approves Hawaii Disaster Declaration.* [Online] August 10, 2023. [Cited: February 16, 2024.] <https://www.whitehouse.gov/briefing-room/presidential-actions/2023/08/10/president-joseph-r-biden-jr-approves-hawaii-disaster-declaration-3/>.

96. Washington Post. An inter island flotilla of boats deliver supplies to Lahaina because the roadway access to West Maui is limited. *Native Hawaiians organize aid for Maui fire victims as government lags.* [Online] August 12, 2023. [Cited: February 16, 2024.] <https://www.washingtonpost.com/nation/2023/08/12/maui-fires-lahaina-native-hawaiians-disaster-relief-boats/>.

97. Residents, Anonymous. For hygiene and hydration purposes, some Kula community members bathe in and drink yellow drinking water. Kula : Interviewed by Author, August 10, 2023.
98. DLNR. The Olinda Fire is 85% contained. *08/19/23-UPCOUNTRY COMPLEX FIRE – OLINDA SECTION, MAUI*. [Online] August 19, 2023. [Cited: February 16, 2024.] <https://dlnr.hawaii.gov/blog/2023/08/21/nr23-128/>.
99. Maui County. Unsafe Water Alerts (USW) issued by DWS for Upper Kula and Lahaina Public Water Systems. *Unsafe water advisory issued for Upper Kula and Lahaina areas affected by wildfires*. [Online] August 11, 2023. [Cited: February 16, 2024.] <https://www.mauicounty.gov/CivicAlerts.aspx?AID=12680>.
100. —. Maui County announces deployment of CERT (community emergency response team). <https://www.mauicounty.gov/1899/Community-Emergency-Response-Team>. [Online] August 11, 2023. [Cited: February 16, 2024.] <https://docs.google.com/spreadsheets/d/1N2aYojG2J7vx-WcL05tF19GZO-TzvRb3DGSiXkNSqU8/edit#gid=0>.
101. HI DOH. FEMA assigns EPA with the mission assignment to survey, remove, and dispose of hazardous materials on properties affected by the wildfires in Maui. This mission assignment is referred to as Phase 1. *DOH ADVISES CAUTION FOR RESIDENTS RETURNING TO WEST MAUI AREA*. [Online] August 11, 2023. [Cited: February 16, 2024.] <https://health.hawaii.gov/news/newsroom/doh-advises-caution-for-residents-returning-to-west-maui-area/>.
102. Maui County. New maps of Unsafe Water Advisories by DWS are issued and posted on MauiCounty.gov website. <https://www.mauicounty.gov/CivicAlerts.aspx?AID=12695>. [Online] August 13, 2023. [Cited: February 16, 2024.] <https://www.mauicounty.gov/CivicAlerts.aspx?AID=12695>.
103. National news report about the lack of water and dry fire hydrants for fire-fighting in Lahaina during the emergency response. Homeowners are forced to fight fires with pools, hoses and buckets. <https://www.nytimes.com/2023/08/13/us/lahaina-water-failure.html>. [Online] August 13, 2023. [Cited: February 17, 2024.] <https://www.nytimes.com/2023/08/13/us/lahaina-water-failure.html>.
104. Maui News Now. The Kula Fire (also reported as the Upcountry Fire) is 60% contained. *Upcountry Updates: Fire about 60% contained; shelter open; water unsafe in impacted areas*. [Online] August 14, 2023. [Cited: February 17, 2024.] <https://mauinow.com/2023/08/14/upcountry-updates-fire-about-60-contained-shelter-open-water-unsafe-in-impacted-areas/>.
105. Hawaii News Now. More than 46,000 tourists have left the island since the event. *Hawaii Tourism Authority: Visitors have ‘largely heeded call’ to leave Maui*. [Online] August 13, 2023. [Cited: February 17, 2024.] <https://www.hawaiinewsnow.com/2023/08/13/hawaii-tourism-authority-visitors-have-largely-heeded-call-leave-maui/>.

106. Maui County. Maui Police Department suspends placard program for travel into West Maui. *Maui County Press Releases*. [Online] August 14, 2023. [Cited: February 17, 2024.] <https://www.mauicounty.gov/CivicAlerts.aspx?AID=12699>.
107. HI DOH. FIRST SAMPLES COLLECTED: Maui DWS collects the first drinking water samples from their Upper Kula and Lahaina Public Water Systems. *News Releases from Department of Health | Maui Department of Water Supply releases first test results from Lāhainā, Upper Kula water systems (hawaii.gov)*. [Online] August 24, 2023. [Cited: February 22, 2024.] <https://health.hawaii.gov/news/newsroom/maui-department-of-water-supply-releases-first-test-results-from-lahaina-upper-kula-water-systems/>.
108. Maui News Now. Search and rescue continues for survivors of the Lahaina Fire. *Maui wildfire updates for Aug. 14: Placard system SUSPENDED; deaths rise to 99 souls : Maui Now*. [Online] August 14, 2023. [Cited: February 22, 2024.] <https://mauinow.com/2023/08/14/maui-wildfire-updates-for-aug-14-west-maui-placard-system-announced-unsafe-water-maps-released/>.
109. HI DOH. FIRST SAMPLES ANALYZED: Hawaii DOH chemically analyzed drinking water samples from Maui County and obtained chemical results. *News Releases from Department of Health | Maui Department of Water Supply releases first test results from Lāhainā, Upper Kula water systems (hawaii.gov)*. [Online] August 24, 2023. [Cited: February 22, 2024.] <https://health.hawaii.gov/news/newsroom/maui-department-of-water-supply-releases-first-test-results-from-lahaina-upper-kula-water-systems/>.
110. Maui County reports the containment status of the multiple fires: Kula Fire, 75% contained, 678 acres with hotspots in gulches; Lahaina Fire, 85% contained 2170 acres with no active threats; Pulehu/Kihei Fire, 100% contained with no active threats, Pu'uk. *8/15 County of Maui Wildfire Disaster Update as of 8:30 pm*. [Online] August 15, 2023. [Cited: February 22, 2024.] <https://www.mauicounty.gov/CivicAlerts.aspx?AID=12711>.
111. Maui County. The road opens to Lahaina for the first time since the fire. *News Flash • Governor Green announces opening of road to Lah (mauicounty.gov)*. [Online] August 15, 2023. [Cited: February 22, 2024.] <https://www.mauicounty.gov/CivicAlerts.aspx?AID=12705>.
112. —. The first confirmed victims of the wildfires are announced. *News Flash • County releases first confirmed identifications (mauicounty.gov)*. [Online] August 15, 2023. [Cited: February 22, 2024.] <https://www.mauicounty.gov/CivicAlerts.aspx?AID=12707>.
113. UH Water Resources Research Center. UH begins collecting drinking water samples at homes. *Master VOC Data*. [Online] August 16, 2024. [Cited: February 22, 2024.]
114. National news reports on ash and debris chemical exposure and health impact concerns for residents returning to the impact areas. *The burn zone on Maui is laden with toxins, officials say : NPR*. [Online] August 17, 2023. [Cited: February 22, 2024.] <https://npr.org/2023/08/17/1194466944/the-burn-zone-on-maui-is-laden-with-toxins-officials-say>.

115. Reuters. The Maui County Emergency Manager resigns. *Maui's chief of emergency management resigns amid criticism* | Reuters. [Online] August 17, 2023. [Cited: February 22, 2024.] <https://www.reuters.com/world/us/biden-pledges-us-support-maui-through-wildfire-recovery-2023-08-17/>.
116. University of Hawaii. THIS STUDY: Purdue University disaster response team arrives in Honolulu and teams up with University of Hawaii experts already working in Hawaii. University of Hawaii hosts a wildfire technical webinar about drinking water contamination. *After the Fire: The Importance of Scientific Support in Protecting Health and Recovery – UHM Water Resources Research Center (hawaii.edu)*. [Online] August 18, 2023. [Cited: February 22, 2024.] <https://www.wrrc.hawaii.edu/after-the-fire-the-importance-of-scientific-support-in-protecting-health-and-recovery/>.
117. Purdue University. THIS STUDY: Purdue University team arrives in Maui and begins Maui household survey. *What's in the water? UH, Purdue researchers are sampling Kula system*. [Online] August 26, 2023. [Cited: February 22, 2024.] <https://www.mauinews.com/news/local-news/2023/08/whats-in-the-water-uh-purdue-researchers-are-sampling-kula-system/>.
118. Maui County. EXPANDED AREA: Maui County expands the Unsafe Water Alert area in Lahaina based on concerns contaminated water may be outside the initial Unsafe Water Alert advisory area. *Unsafe Water Advisory for Lahaina water system expanded*. [Online] August 19, 2023. [Cited: February 22, 2024.] <https://www.mauicounty.gov/CivicAlerts.aspx?AID=12732>.
119. Associated Press. News report that after some prior US wildfires, in-home water filters may be incapable of making the contaminated drinking water safe. *Maui water is unsafe even with filters, one of the lessons learned from fires in California* | AP News. [Online] August 19, 2023. [Cited: February 22, 2024.] <https://apnews.com/article/wildfire-water-contamination-maui-hawaii-fires-c547955833ceaf86af8c3f1553f1f546>.
120. ABC News. President Biden visits Maui. *President Biden, first lady visit Maui to hear from survivors after devastating wildfires - ABC News (go.com)*. [Online] August 21, 2023. [Cited: February 22, 2024.] <https://abcnews.go.com/Politics/president-biden-lady-visit-maui-after-wildfires/story?id=102408000>.
121. Lahaina News. University of Hawaii launches Drinking Water Information Hub to serve as a community information resource and to other relevant sources of information. *Safety of Maui drinking water focus of UH research* | News, Sports, Jobs - Lahaina News. [Online] September 12, 2023. [Cited: February 22, 2024.] <https://www.lahainanews.com/news/local-news/2023/09/12/safety-of-maui-drinking-water-focus-of-uh-research/>.
122. Purdue University. Purdue University, University of Hawaii, Robby Seeger, and experts from Paradise and Santa Rosa, California Louisville and Superior, Colorado meet with Maui DWS to provide drinking water system disaster response technical assistance. *Purdue professor 'brings the world' to help after Maui, Hawaii, wildfires*. [Online] September 25, 2023. [Cited: February 22, 2024.] <https://stories.purdue.edu/purdue-professor-brings-the-world-to-help-after-maui-hawaii-wildfires/>.

123. Maui Now. Some shelters are closed and persons in those shelters are moved to temporary housing. *Lahaina wildfire recovery Day 20: land search is complete, survivors are no longer expected*. [Online] August 28, 2023. [Cited: February 22, 2024.]

<https://mauinow.com/2023/08/28/lahaina-wildfire-recovery-day-20-land-search-is-complete-survivors-are-no-longer-expected/>.

124. Maui County. "A helicopter is deployed to work on hot spots in response to the Kula Fire and Olinda Fire and containment update . Maui County reports the containment status of the multiple fires: Olinda Fire, 85% contained. Estimated 1,081 acres; Kula fire, 85% cont. 8/23 *County of Maui Wildfire Disaster Update*. [Online] August 23, 2023. [Cited: February 22, 2024.] <https://www.mauicounty.gov/CivicAlerts.aspx?AID=12756>.

125. —. The USEPA begins hazardous materials removal in Kula. *News Flash • 8/23/2023 — U.S. EPA begins hazardous waste rem (mauicounty.gov)*. [Online] August 23, 2023. [Cited: February 22, 2024.]

<https://www.mauicounty.gov/CivicAlerts.aspx?AID=12757#:~:text=The%20U.S.%20Environm%20Protection%20Agency%20%28EPA%29%20on%20Wednesday,includin%20paints%2C%20cleaners%2C%20solvents%2C%20oils%2C%20batteries%2C%20and%20pesticides..>

126. Forbes. The Hawaii Governor publicly asks tourists to return to Maui. *Hawaii Travel Update: Governor Asks Tourists To Come Back To Maui (forbes.com)*. [Online] August 23, 2023. [Cited: February 22, 2024.]

<https://www.forbes.com/sites/willmcgough/2023/08/23/hawaii-travel-update-governor-asks-tourists-to-come-back-to-maui/?sh=32ec080c551f>.

127. Hawaii News Now. National news reports that some Lahaina residents who did not evacuate have no power, donations are locally organized, some residents complain about breathing problems if breathing the air for "5 minutes". *The air is bad and the power is off, but these Lahaina families aren't going anywhere (hawaiinewsnow.com)*. [Online] August 24, 2023. [Cited: February 22, 2024.] <https://www.hawaiinewsnow.com/2023/08/25/air-is-bad-power-is-off-these-lahaina-families-arent-leaving-their-homes/>.

128. *Purdue University, and other experts from Paradise, California, and Louisville, Colorado meet with Native Hawaiian households to provide advice on response and recovery in the context of insurance, government reimbursements, and water system damage assess*. Lahaina, August 24, 2023.

129. Maui County. PUBLIC MEETING: The first public meeting with the DWS and community is held in Kula. Elected leaders (Maui Mayor Bissen, Vice-Chair Councilwoman Uki Lei Sigumura), DWS, Upcountry Strong/ Kula Hub (Tim Lara), Kula Lodge Team, American Red Cross, FEMA, Maui. <https://www.mauicounty.us/press-release/kula-community-meeting-tomorrow-night-on-water-safety/>. [Online] August 23, 2023. [Cited: February 22, 2024.] <https://www.mauicounty.us/press-release/kula-community-meeting-tomorrow-night-on-water-safety/>.

130. HI DOH. FIRST TEST RESULTS RELEASED: For the first time, DWS releases their first public test results (27 samples) from Upper Kula and Lahaina Public Water Systems. Samples were collected August 14, 6 days after the evacuation. Benzene and total xylenes were some. *News Releases from Department of Health | Maui Department of Water Supply releases first test results from Lāhainā, Upper Kula water systems (hawaii.gov)*. [Online] August 24, 2023. [Cited: February 22, 2024.] <https://health.hawaii.gov/news/newsroom/maui-department-of-water-supply-releases-first-test-results-from-lahaina-upper-kula-water-systems/>.
131. Maui County. For the first time, DWS makes first test results from Upper Kula and Lahaina Public Water System publicly available. *News Flash • Long-Term Monitoring Program samples for 11/29/ (mauicounty.gov)*. [Online] August 23, 2023. [Cited: February 22, 2022.] <https://www.mauicounty.gov/CivicAlerts.aspx?AID=12755>.
132. —. Maui County provides private home testing information including phone numbers for Aecos Laboratory and FoodQuality Labs. Maui County recommends homeowners ask for the "VOC Test Panel". *Water Quality Laboratory Information*. [Online] August 24, 2023. [Cited: February 22, 2023.] <https://www.mauicounty.gov/CivicAlerts.aspx?AID=12760>.
133. Honolulu Civil Beat. Local news reports that a Kula resident mentions that with communications down her family was unaware the water system was unsafe, and friends and family were how she found out. She recommends written notices be sent when communications are down or spotty. *What About The Water?' Upcountry Residents Want Answers After Maui Fires Prompt Advisories - Honolulu Civil Beat*. [Online] August 24, 2023. [Cited: February 22, 2024.] <https://www.civilbeat.org/2023/08/what-about-the-water-upcountry-residents-want-answers-after-maui-fires-prompt-advisories/>.
134. Maui County. The new Maui Emergency Management Agency Director is announced. *News Flash • Darryl Oliveira hired as interim director of Ma (mauicounty.gov)*. [Online] August 25, 2023. [Cited: February 22, 2024.] <https://www.mauicounty.gov/CivicAlerts.aspx?AID=12769>.
135. MEMA. Firefighters respond to Kaanapali Hillside from Anapuni Loop to West Mahipulu. *Twitter @Maui\_EMA*. [Online] August 26, 2023. [Cited: February 22, 2024.] [https://twitter.com/Maui\\_EMA/status/1695595600182710487](https://twitter.com/Maui_EMA/status/1695595600182710487).
136. —. The Ka'anapali Fire evacuation order is lifted. *Twitter @Maui\_EMA*. [Online] August 26, 2023. [Cited: February 22, 2024.] [https://twitter.com/Maui\\_EMA/status/1695639217467252849](https://twitter.com/Maui_EMA/status/1695639217467252849).
137. *THIS STUDY: Purdue University, University of Hawaii, and Louisville Colorado experts conduct inspection of agricultural water systems at the request of the Hawaii Department of Agriculture in and around the burn area*. Maui, August 27, 2023.
138. Hawaii DOH issued a factsheet about VOCs in drinking water, then updated September 2023. *Volatile Organic Compounds (VOCs) Fact Sheet*. [Online] August 27, 2023. [Cited: February 2024, 2024.] <https://www.mauicounty.gov/CivicAlerts.aspx?AID=12781>.



139. Maui Now. At this 20 day mark, the search for survivors ends. *Lahaina wildfire recovery Day 20: land search is complete, survivors are no longer expected*. [Online] August 28, 2023. [Cited: February 22, 2024.] <https://mauinow.com/2023/08/28/lahaina-wildfire-recovery-day-20-land-search-is-complete-survivors-are-no-longer-expected/>.
140. Hawaii News Now. Schools in Lahaina remain closed from the fire. *DOE announces tentative timeframe to welcome students back to West Maui schools (hawaiinewsnow.com)*. [Online] August 29, 2023. [Cited: February 22, 2024.] <https://www.hawaiinewsnow.com/2023/08/30/doe-announces-tentative-timeframe-welcome-students-back-west-maui-schools/>.
141. Maui County. Maui County delivering solar showers to Upcountry Unsafe Water Alert areas. *News Flash • 8/29 County of Maui distributing more than 1,00 (mauicounty.gov)*. [Online] August 29, 2023. [Cited: February 22, 2024.] <https://www.mauicounty.gov/CivicAlerts.aspx?AID=12788>.
142. ABC NEWS. National news reports that the search for fire victims on land ends, now moves to nearshore waters. *Maui wildfire victims search on land ends, moves to the ocean - ABC News (go.com)*. [Online] August 29, 2023. [Cited: February 23, 2024.] <https://abcnews.go.com/US/maui-officials-search-wildfire-victims-ocean-land-search/story?id=102648231>.
143. Maui County. Maui County announces that solar showers are being made available to residents in the Upcountry Unsafe Water Alert areas. *News Flash • 09/05 Solar shower bags available today for Upc (mauicounty.gov)*. [Online] September 5, 2023. [Cited: February 23, 2024.] <https://www.mauicounty.gov/CivicAlerts.aspx?AID=12814>.
144. —. Reduction of potable water tanker locations down to two sites in Kula. *Location of potable water tankers in Upper Kula and Lahaina as of 10/30/2023*. [Online] September 7, 2023. [Cited: February 23, 2024.] <https://www.mauicounty.gov/CivicAlerts.aspx?AID=12824>.
145. NBC News. Filipinos in Lahaina say they've been overlooked in wildfire response. [Online] September 7, 2023. [Cited: February 27, 2024.] <https://www.nbcnews.com/news/asian-america/filipinos-maui-hawaii-wildfires-rcna102375>.
146. Maui County. Maui County announces a reminder that USW alert remains in effect for the Upper Kula public water system. *News Flash • 09/09 Unsafe Water Advisory reminder for Upper (mauicounty.gov)*. [Online] September 9, 2023. [Cited: February 23, 2024.] <https://www.mauicounty.gov/CivicAlerts.aspx?AID=12831>.
147. HI DOH. Hawaii DOH announces toluene detected in the Upper Kula Public Water System. *News Releases from Department of Health | Trace amount of toluene detected in Upper Kula water system (hawaii.gov)*. [Online] September 11, 2023. [Cited: February 23, 2024.] <https://health.hawaii.gov/news/newsroom/trace-amount-of-toluene-detected-in-upper-kula-water-system/>.

148. Maui County removes a portion of Upper Kula removed from Unsafe Water Alert advisory. *News Flash • 09/12 Notice: Amended Unsafe Water Advisory for (mauicounty.gov)*. [Online] September 12, 2024. [Cited: February 23, 2024.] <https://www.mauicounty.gov/CivicAlerts.aspx?AID=12844>.
149. HI DOH. HI DOH releases air testing results for Lahaina and Upcountry for the first time. *News Releases from Department of Health | DOH releases preliminary, unvalidated data from Maui air sampling (hawaii.gov)*. [Online] September 12, 2023. [Cited: February 23, 2024.] <https://docs.google.com/spreadsheets/d/1N2aYojG2J7vx-WcL05tF19GZO-TzvRb3DGSiXkNSqU8/edit#gid=0>.
150. Maui County. Maui County warns that sewer service remains inactive since the wildfires for many properties in the fire impacted areas and that toilet flushing and other activities should not be conducted. Lift stations and power systems were damaged. *News Flash • 09/13 Sewer service inactive for many standing (mauicounty.gov)*. [Online] September 13, 2023. [Cited: February 23, 2024.] <https://www.mauicounty.gov/CivicAlerts.aspx?AID=12846>.
151. WRRC. *UH begins returning drinking water results to homeowners*. September 17, 2023.
152. Commission on Water Resource Management. CWRM Posts an update on Water Resources in the Lahaina Aquifer Sector Area. *Update on Water Resources in the Lahaina Aquifer Sector Area Agenda Item C-1*. [Online] September 13, 2023. [Cited: February 27, 2024.] <chrome-extension://efaidnbmninnibpcajpcgclclefindmkaj/https://files.hawaii.gov/dlnr/cwrmsubmittal/2023/sb20230919C1.pdf>.
153. Maui County. Containment Announcement: Olinda fire: 90% contained. Estimated 1,081 acres. Kula fire: 96% contained. Estimated 202 acres. Lahaina fire: 100% contained. Estimated 2,170 acres. *9/20 MAUI WILDFIRE DISASTER UPDATE*. [Online] September 20, 2023. [Cited: February 23, 2024.] <https://docs.google.com/spreadsheets/d/1N2aYojG2J7vx-WcL05tF19GZO-TzvRb3DGSiXkNSqU8/edit#gid=0>.
154. Associated Press. Lahaina residents begin to be allowed to return to their properties for supervised visits. *Lahaina residents brace for what they'll find as they return to devastated properties in burn zone | AP News*. [Online] September 20, 2023. [Cited: February 23, 2024.] <https://apnews.com/article/lahaina-maui-wildfire-reentry-9ae428c3af31f3ebb224157aeb4efff4>.
155. Maui County. Lauiniupoko beach park opens. *Popular Lauiniupoko Beach Park reopens after county staff who lost homes work on project*. [Online] September 23, 2023. [Cited: February 23, 2024.] <https://www.mauicounty.gov/CivicAlerts.aspx?AID=12886>.
156. —. The first phase of residential reentry in Lahaina begins. *News Flash • 09/25 Residents in Zone 1C return to their Laha (mauicounty.gov)*. [Online] September 25, 2023. [Cited: February 23, 2024.] <https://www.mauicounty.gov/CivicAlerts.aspx?AID=12891>.
157. —. Containment announcement: Olinda fire: Increased to 95% contained. Estimated 1,081 acres. Kula fire: 96% contained. Estimated 202 acres. Lahaina fire: 100% contained. Estimated

2,170 acres. *9/25 MAUI WILDFIRE DISASTER UPDATE*. [Online] September 25, 2023. [Cited: February 23, 2024.] <https://www.mauicounty.gov/CivicAlerts.aspx?AID=12890>.

158. Civil Beat. The Hawaii Department of Education announces that school begins October 16 in Lahaina, the first day back since the fire in August. *Lahaina Schools To Reopen Some 2 Months After Fire - Honolulu Civil Beat*. [Online] September 26, 2023. [Cited: February 23, 2024.] <https://www.civilbeat.org/2023/09/lahaina-schools-to-reopen-some-2-months-after-fire/>.

159. HI DOH. The Hawaii DOH revised and reissued a fact sheet about how residents can protect themselves from wildfire debris hazards. The Hawaii DOH revised and reissued a fact sheet about how residents can protect themselves from wildfire debris hazards. *Hazard Advisory (hawaii.gov)*. [Online] September 27, 2023. [Cited: February 23, 2024.] <chrome-extension://efaidnbmnnnibpcajpcglclefindmkaj/https://health.hawaii.gov/mauiwildfires/files/2023/08/Hazards-Advisory.pdf>.

160. Maui County. Maui County announces that a portion of Upper Kula and Lahaina removed from Unsafe Water Alert advisory. <https://www.mauicounty.gov/CivicAlerts.aspx?AID=12926>. [Online] October 6, 2023. [Cited: February 23, 2024.] <https://www.mauicounty.gov/CivicAlerts.aspx?AID=12926>.

161. —. Phased reopening begins for tourism on the west side. *County of Maui releases series of video messages for the Maui community and its visitors*. [Online] October 7, 2023. [Cited: February 27, 2024.] <https://www.mauicounty.gov/CivicAlerts.aspx?AID=12930>.

162. —. Maui County approves the use of Soiltac for wildfire impact areas. *Use of soil stabilizer Soiltac® approved for properties impacted by August 8th fire in Lahaina*. [Online] October 9, 2023. [Cited: February 27, 2024.] <https://www.mauicounty.gov/CivicAlerts.aspx?AID=12937>.

163. —. Maui County announces that a portion of Upper Kula and Lahaina removed from Unsafe Water Alert advisory. *News Flash • Upper Kula Area UK-4 and Lahaina Area L-2 removed (mauicounty.gov)*. [Online] October 9, 2023. [Cited: February 27, 2024.] <https://www.mauicounty.gov/CivicAlerts.aspx?AID=12936>.

164. —. Maui County proposes 3 billing categories for drinking water customers in the fire impact areas. *News Flash • County of Maui proposing three billing categories (mauicounty.gov)*. [Online] October 12, 2023. [Cited: February 27, 2024.] <https://www.mauicounty.gov/CivicAlerts.aspx?AID=12942>.

165. —. Upper Kula area UK3 removed from unsafe water advisory. *Portion of Upper Kula removed from Unsafe Water Advisory area*. [Online] October 13, 2023. [Cited: February 27, 2024.] <https://www.mauicounty.gov/CivicAlerts.aspx?AID=12952>.

166. KHON2. The Hawaii DOH releases results of Kula ash and debris chemical testing. *DOH: 'Extremely high levels' of arsenic and other materials detected in Kula ash | KHON2*. [Online] October 15, 2023. [Cited: February 27, 2024.] <https://www.khon2.com/top-stories/high-levels-of-toxins-in-kula-ash-prompt-new-guidance-from-doe-as-lahaina-schools-reopen/>.

167. HI DOH. The Hawaii Department of Health revised and reissued a factsheet about wildfire ash health risks. *Toxins in Maui Wildfire Ash (hawaii.gov)*. [Online] October 18, 2023. [Cited: February 27, 2024.] <https://health.hawaii.gov/mauiwildfires/files/2023/10/DOH-Maui-Ash-Toxins-Fact-Sheet.pdf>.
168. Hawaii News Now. DWS removes water meters from burned homes. *Kula residents who lost homes in fire say county took much-needed water meters*. [Online] October 27, 2023. [Cited: February 27, 2024.] <https://www.hawaiinewsnow.com/video/2023/10/27/kula-residents-who-lost-homes-fire-say-county-took-much-needed-water-meters/>.
169. Maui County. For Upper Kula Public Water System, DWS lifts the last USW alerts. USW still in place for parts of Lahaina public water system. *News Flash • Unsafe Water Advisory lifted for all areas of U (mauicounty.gov)*. [Online] October 31, 2023. [Cited: February 27, 2024.] <https://www.mauicounty.gov/CivicAlerts.aspx?AID=12999#:~:text=The%20Department%20of%20Water%20Supply%20has%20lifted%20the,safe%20for%20unrestricted%20use%20effective%20October%2031%2C%202023..>
170. USEPA. USEPA begins removal of hazardous materials in Lahaina impact area. *EPA Begins Hazardous Materials Removal on Commercial Properties in Lāhainā, Maui | US EPA*. [Online] November 3, 2023. [Cited: February 27, 2024.] <https://docs.google.com/spreadsheets/d/1N2aYojG2J7vx-WcL05tF19GZO-TzvRb3DGSiXkNSqU8/edit#gid=0>.
171. Maui County. New red flag warning issued. *News Flash • Public advised to remain vigilant with Red Flag (mauicounty.gov)*. [Online] November 5, 2023. [Cited: February 27, 2024.] <https://www.mauicounty.gov/CivicAlerts.aspx?AID=13010>.
172. —. Lahaina underground parking garage flooded since August wildfires begins to be drained. *News Flash • 11/16/2023 Work to drain underground parking ga (mauicounty.gov)*. [Online] November 16, 2023. [Cited: February 27, 2024.] <https://www.mauicounty.gov/CivicAlerts.aspx?AID=13045>.
173. —. Maui County announces that a portion of Lahaina removed from Unsafe Water Alert advisory. *News Flash • Portion of Lahaina removed from Unsafe Water Ad (mauicounty.gov)*. [Online] November 21, 2023. [Cited: February 27, 2024.] <https://www.mauicounty.gov/CivicAlerts.aspx?AID=13054>.
174. —. Lahaina customers within and near the burn zone are asked to reduce toilet flushing, bathing, washing clothes and cleaning dishes. *County Wastewater Reclamation Division prepares for kona low weather system, asks for West Maui sewe*. [Online] November 29, 2023. [Cited: February 27, 2024.] <https://www.mauicounty.gov/CivicAlerts.aspx?AID=13054>.
175. —. Maui County experiences the first significant rainfall event since the wildfires. *News Flash • Heavy rain spurs flooding, road closures; W. Ma (mauicounty.gov)*. [Online] November 30, 2023. [Cited: March 1, 2024.] <https://www.mauicounty.gov/CivicAlerts.aspx?AID=13088>.

176. USEPA. USEPA completes removal of hazardous materials for Phase 1 in ALL wildfire impacted areas. *EPA Completes Removal of Hazardous Materials Following Wildfires on Maui | US EPA*. [Online] December 1, 2023. [Cited: March 1, 2024.] <https://www.epa.gov/newsreleases/epa-completes-removal-hazardous-materials-following-wildfires-maui>.
177. HI DOH. Hawaii DOH releases results of Lahaina ash and debris chemical testing. *Governor Josh Green, M.D. | DOH News Release – Lahaina Ash Characterization Testing Show Elevated Levels of Toxic Substances (hawaii.gov)*. [Online] December 10, 2023. [Cited: March 1, 2024.] <https://governor.hawaii.gov/newsroom/doh-news-release-lahaina-ash-characterization-testing-show-elevated-levels-of-toxic-substances/>.
178. Maui County. All zones now open in Lahaina. *News Flash • County of Maui completes re-opening of all 83 L (mauicounty.gov)*. [Online] December 12, 2023. [Cited: March 1, 2024.] <https://www.mauicounty.gov/CivicAlerts.aspx?AID=13116>.
179. Civil Beat. More than 6,200 residents displaced by the wildfires, comprising 2,623 households, remain spread across 33 hotels and condominiums. *Families Displaced By The Maui Fires Are Tired Of Shuffling Between Hotel Rooms - Honolulu Civil Beat*. [Online] December 13, 2023. [Cited: March 1, 2024.] <https://www.civilbeat.org/2023/12/families-displaced-by-the-maui-fires-are-tired-of-shuffling-between-hotel-rooms/>.
180. Maui County. Maui County announces that a portion of Lahaina removed from Unsafe Water Alert advisory area. *News Flash • DWS lifts unsafe water advisory for area near L (mauicounty.gov)*. [Online] December 14, 2023. [Cited: March 1, 2024.] <https://www.mauicounty.gov/CivicAlerts.aspx?AID=13117>.
181. Office of the Governor. Governor Extends Emergency Proclamation. *OFFICE OF THE GOVERNOR – NEWS RELEASE – GOVERNOR GREEN EXTENDS EMERGENCY PROCLAMATION ON WILDFIRES*. [Online] January 5, 2024. [Cited: March 1, 2024.] <https://governor.hawaii.gov/newsroom/office-of-the-governor-news-release-governor-green-extends-emergency-proclamation-on-wildfi/>.
182. Maui News Now. First property impacted by the Lahaina fire is cleared of debris. *Milestone moment as first property is cleared of residential wildfire debris in Lahaina, Maui : Maui Now*. [Online] January 18, 2024. [Cited: March 1, 2024.] <https://mauinow.com/2024/01/18/milestone-moment-as-first-property-is-cleared-of-residential-wildfire-debris-in-lahaina-maui/>.
183. Maui County. Maui County announces that a portion of Lahaina removed from Unsafe Water Alert advisory area. *Maui County announces that a portion of Lahaina removed from Unsafe Water Alert advisory area*. [Online] News Flash • Portion of Lahaina removed from Unsafe Water Ad (mauicounty.gov), January 19, 2024. [Cited: March 1, 2024.] <https://www.mauicounty.gov/CivicAlerts.aspx?AID=13217>.
184. Maui News. HI DOH announces increased air quality monitoring during debris removal. *DOH to increase air monitoring, sampling during debris removal | News, Sports, Jobs - Maui News*. [Online] January 23, 2024. [Cited: March 1, 2024.]

<https://www.mauinews.com/news/local-news/2024/01/doh-to-increase-air-monitoring-sampling-during-debris-removal/>.

185. Maui County. Portions of Lahaina Removed from Unsafe Water Advisory Portions of Lahaina Removed from Unsafe Water Advisory. *Portion of Lahaina removed from Unsafe Water Advisory*. [Online] February 16, 2024. [Cited: March 1, 2024.]  
<https://www.mauicounty.gov/CivicAlerts.aspx?AID=13282>.

186. More than 2,700 participate in county surveys on possible Permanent Disposal sites for toxic debris. *More than 2,700 participate in county surveys on possible PDS sites*. [Online] February 22, 2024. [Cited: March 1, 2024.]  
<https://www.mauicounty.gov/CivicAlerts.aspx?AID=13290>.

Table SI-1. Census Data for Kula and Lahaina, Hawai‘i

| US Census Information                           | Kula       | Lahaina  | Maui County |
|-------------------------------------------------|------------|----------|-------------|
| Population (2020)                               | 6,942      | 12,702   | 164,754     |
| Population per square mile (2020)               | 201        | 1632.2   | 141.8       |
| Age and Sex, %                                  |            |          |             |
| Persons under 5 years                           | 4.1        | 7.6      | 5.3         |
| Persons under 18 years                          | 20.6       | 22.9     | 20.9        |
| Persons 65 years and over                       | 25.4       | 16.7     | 20.7        |
| Female persons                                  | 52         | 49.2     | 50.1        |
| Race and Hispanic Origin, %                     |            |          |             |
| White                                           | 55.2       | 26.8     | 34.6        |
| Black or African American                       | 0          | 0.1      | 0.9         |
| American Indian and Alaska Native               | 0.3        | 0.3      | 0.6         |
| Asian                                           | 19.9       | 37.9     | 28.6        |
| Native Hawaiian and Other Pacific Islander      | 5          | 8.5      | 10.4        |
| Two or more races                               | 14         | 24.3     | 24.9        |
| Hispanic or Latino                              | 6.8        | 13.1     | 12          |
| White alone, not Hispanic or Latino             | 51.4       | 23.5     | 29.8        |
| Housing                                         |            |          |             |
| Owner-occupied housing unit rate, % (2018-2022) | 67.8       | 51.8     | 65.3        |
| Median Value of owner-occupied housing units    | \$1,144,00 | 803,000  | 800,100     |
| Families and Living Arrangements                |            |          |             |
| Households, % (2018-2022)                       | 2,480      | 3,562    | 54,728      |
| Persons per household                           | 2.64       | 3.53     | 2.96        |
| Language, Education, and Income                 |            |          |             |
| Language other than English spoken at home, %   | 13         | 37.2     | 22.1        |
| Bachelor's degree or higher, %                  | 39.1       | 24.8     | 30.1        |
| Median household income (2022)                  | \$93,452   | \$83,443 | \$95,379    |
| Persons in poverty, %                           | 11.2       | 11.7     | 9           |

Source:

<https://www.census.gov/quickfacts/fact/table/kulacdphawaii,mauicountyhawaii,lahainacdphawaii/PST045223?>

CDPs were for Kula and Lahaina and are census designated places

### SI-3. Survey Instrument

#### 1. PROPERTY CHARACTERISTICS

What is your name?

What is your email address (so we can send results)?

What is the address (so we can validate location)?

How many people from each category live in the home?

\_\_\_\_\_ Less than 1 year old

\_\_\_\_\_ 1 to 17 years old

\_\_\_\_\_ 18 to 64 years old

\_\_\_\_\_ 65+ years old

Do you own or rent the home?

Own       Rent       Other: \_\_\_\_\_

How long have you lived at the home in years?

Was your home damaged by the wildfire? If yes, please explain

Do you have home/renter's insurance?  Yes  No

#### 2. INCIDENT

Where were you when you learned about the fire?

From whom and how did you learn that there was a fire?

What day/time did you evacuate the area?

What day/time did you first visit/ return to your home?

Did your home lose power during or since the fire? If so, when and how long?

Did fire damage anything on your property? If so what?

#### 3. DRINKING WATER SOURCE AND SYSTEM

How is water provided to your home?

Water company       Private well

Private cistern       Other: \_\_\_\_\_



Before the fire, did you have drinking water treatment devices or systems installed at home?

Yes No

If yes, please explain \_\_\_\_\_

Since the fire, have you installed or purchased in-home drinking water treatment devices or systems?

Yes No If yes, please explain \_\_\_\_\_

After returning home, did you notice any changes with the water such as taste/odor/it's color/clarity? If yes, please describe

After returning home, did you notice low or no water pressure? If yes, please describe:

Is your home in a drinking water advisory/unsafe water alert area? Yes No

What day/time did you first find out about the alert?

How did you first find out about the alert?

Since you learned about the alert, have you used water from your plumbing? Yes No

If yes, for what activities?

If your home is not in the alert area or before it got issued, have you used water from your plumbing? Yes No

If yes, for what activities?

Since the fire, have you used bottled water at home due to drinking water concerns? If yes, for what activities?

Did you pay for this bottled water? Where did you obtain the bottled water?

Did you obtain emergency drinking water from "water buffalos" which are public water dispensing stations?

Yes No

Since the fire, have you flushed your plumbing (i.e., like run faucets, hose spigots)? If so, please explain.

#### 4. PROXIMITY TO DAMAGED OR DESTROYED BUILDINGS

Approximately how far away from your home is a building that was damaged or destroyed by the fire?

Do you know someone who's building was damaged or destroyed by the fire? Yes No

#### 5. ADVICE AND SUPPORT

Since the fire, who has provided you advice about your drinking water?

- A state agency or representative
- Maui County Health Department
- Department of Water Supply
- In-home water treatment company
- Water testing laboratory
- Other, please explain: \_\_\_\_\_

Which one do you most trust right now?

- A state agency or representative
- Maui County Health Department
- Department of Water Supply
- In-home water treatment company
- Water testing laboratory
- Other, please explain: \_\_\_\_\_

Who do you think is the most responsible for determining which water tests are needed after the fire for determining if the utility pipes are safe?

- The local water utility
- Maui County Health Department
- Hawaii Department of Health (DOH)
- Other, please describe: \_\_\_\_\_

Who do you think is the most responsible for determining which water tests are needed after the fire for determining if the homeowner plumbing is safe?

- The homeowner
- Homeowner insurance company
- The local water utility
- Maui County Health Department
- Hawaii Department of Health (DOH)
- Other, please describe: \_\_\_\_\_

Since the fire, have you conducted water testing? If yes, please explain (When? Who? For what? How many times?):

\_\_\_\_\_

## 6. IMPORTANT REMAINING HOME QUESTIONS

As of today, what (3 to 5) questions do you have about drinking water safety that you want answered?

What is your age? \_\_\_\_\_

Diagram of property water system

Building ID: \_\_\_\_\_

#### SI-4. SI File References

1. NOAA. Hurricane Dora named by the National Hurricane Center . *Hurricane DORA Advisory Archive (noaa.gov)*. [Online] [Cited: February 12, 2024.] <https://www.nhc.noaa.gov/archive/2023/DORA.shtml>.
2. Hawaii News Now. Red flag warning Issued by MEMA and HI EMA. *First Alert Weather Day : Red flag warning extended as Dora tracks west*. [Online] August 6, 2023. [Cited: February 12, 2024.] <https://www.hawaiinewsnow.com/2023/08/06/first-alert-high-wind-fire-watches-issued-ahead-dry-gusty-weather/>.
3. MEMA. High Wind Warning Downslope Leeward Maui. *Twitter @Maui\_EMA*. [Online] August 7, 2023. [Cited: February 12, 2024.] [https://twitter.com/Maui\\_EMA/status/1688727247124131840](https://twitter.com/Maui_EMA/status/1688727247124131840).
4. Maui News. County officials meet and partially activate the Emergency Operations Center in Wailuku; two MEMA staff stay overnight. *Mayor details county response in the early hours of wildfires*. [Online] September 1, 2023. [Cited: February 12, 2024.] <https://www.mauinews.com/news/local-news/2023/09/mayor-details-county-response-in-the-early-hours-of-wildfires/>.
5. Maui Electric. Moloka'i power outage due to downed power lines from high wind. *Twitter @MauiElectric*. [Online] August 7, 2023. [Cited: February 12, 2024.] <https://twitter.com/MauiElectric/status/1688774866357350400>.
6. Global News. Security Footage: The Olinda Fire began at the Bird Conservation Center. *Global News YouTube Channel*. [Online] August 16, 2023. [Cited: February 12, 2024.] <https://www.youtube.com/watch?v=qe8xsUlaYac>.
7. Washington Post. Fire first reported in Olinda, named the Olinda Fire. *Power lines likely caused Maui's first reported fire, video and data show*. [Online] August 16, 2023. [Cited: February 12, 2024.] <https://www.washingtonpost.com/climate-environment/2023/08/15/maui-fires-power-line-cause/>.
8. HECO, Shelee M. Kimura President and CEO. HECO received the first call of an outage and dispatched a troubleman. *Hawaiian Electric Company*. [Online] October 27, 2023. [Cited: February 12, 2024.] <chrome-extension://efaidnbmnnnibpcajpcgclefindmkaj/https://docs.house.gov/meetings/IF/IF02/20230928/116431/HHRG-118-IF02-Wstate-KimuraS-20230928-SD002.pdf>.
9. Maui Police Department. Evacuations begin in Olinda. *MPD's Preliminary After-Action Report*. [Online] August 8, 2023. [Cited: February 26, 2024.] [chrome-extension://efaidnbmnnnibpcajpcgclefindmkaj/https://selfreliancecentral.com/wp-content/uploads/2024/02/pre\\_aar.pdf](chrome-extension://efaidnbmnnnibpcajpcgclefindmkaj/https://selfreliancecentral.com/wp-content/uploads/2024/02/pre_aar.pdf).

10. Maui Police Department. Tree blocking Highway at 10400 Haleakala Highway. *MPD's Preliminary After-Action Report*. [Online] August 8, 2023. [Cited: February 26, 2024.] [chrome-extension://efaidnbmnnnibpcajpcgclefindmkaj/https://selfreliancecentral.com/wp-content/uploads/2024/02/pre\\_aar.pdf](chrome-extension://efaidnbmnnnibpcajpcgclefindmkaj/https://selfreliancecentral.com/wp-content/uploads/2024/02/pre_aar.pdf).
11. Maui Police Department. Officer injured in response to Olinda fire, transported to hospital. . *MPD's Preliminary After-Action Report* . [Online] August 8, 2023. [Cited: February 26, 2024.] [chrome-extension://efaidnbmnnnibpcajpcgclefindmkaj/https://selfreliancecentral.com/wp-content/uploads/2024/02/pre\\_aar.pdf](chrome-extension://efaidnbmnnnibpcajpcgclefindmkaj/https://selfreliancecentral.com/wp-content/uploads/2024/02/pre_aar.pdf).
12. Maui County. An evacuation order was issued for the Auli'i Drive area in response to the Olinda Fire. *Maui County*. [Online] August 8, 2023. [Cited: February 13, 2024.] <https://www.mauicounty.gov/CivicAlerts.aspx?AID=12621>.
13. MEMA. An evacuation order was issued for the Kula 200 area in response to the Olinda Fire. *Twitter @Maui\_EMA*. [Online] August 8, 2023. [Cited: February 13, 2024.] [https://twitter.com/Maui\\_EMA/status/1688917802286288898](https://twitter.com/Maui_EMA/status/1688917802286288898).
14. Maui County. Hanamu Road is evacuated in response to the Olinda Fire. *MauiCounty.gov*. [Online] August 8, 2023. [Cited: February 13, 2024.] <https://www.mauicounty.gov/CivicAlerts.aspx?AID=12621>.
15. Company, Shellee M. Kimura President and CEO of Hawaiian Electric. West Maui transmission line tripped offline automatically, requiring manual activation per Reclose Blocking Procedure. *HECO*. [Online] October 27, 2023. [Cited: February 13, 2024.] <chrome-extension://efaidnbmnnnibpcajpcgclefindmkaj/https://docs.house.gov/meetings/IF/IF02/20230928/116431/HHRG-118-IF02-Wstate-KimuraS-20230928-SD002.pdf>.
16. Maui Police Department. *MPD's Preliminary After-Action Report* . [Online] August 8, 2023. [Cited: February 26, 2024.] [chrome-extension://efaidnbmnnnibpcajpcgclefindmkaj/https://selfreliancecentral.com/wp-content/uploads/2024/02/pre\\_aar.pdf](chrome-extension://efaidnbmnnnibpcajpcgclefindmkaj/https://selfreliancecentral.com/wp-content/uploads/2024/02/pre_aar.pdf).
17. MEMA. An evacuation order is issued for multiple streets near King Kekaulike High School in response to the Olinda Fire. *Twitter @Maui\_EMA*. [Online] August 8, 2023. [Cited: February 13, 2024.] <https://docs.google.com/spreadsheets/d/1N2aYojG2J7vx-WcL05tF19GZO-TzvRb3DGSiXkNSqU8/edit#gid=0>.
18. Maui Electric. Power outages from Lahaina to Napili, Olinda to Piiholo, and Kamehameha Hwy Moloka'i are reported. *Twitter @MauiElectric*. [Online] August 8, 2023. [Cited: February 13, 2024.] <https://twitter.com/MauiElectric/status/1688945192563515392>.
19. Maui Electric. Power is restored to Lahaina. *Twitter @MauiElectric*. [Online] August 8, 2023. [Cited: February 13, 2024.] <https://twitter.com/MauiElectric/status/1688949804980903936>.
20. Maui Police Department. Police evacuate 13000 block of Haleakala Highway. *MPD's Preliminary After-Action Report* . [Online] August 8, 2023. [Cited: February 26, 2024.] [chrome-extension://efaidnbmnnnibpcajpcgclefindmkaj/https://selfreliancecentral.com/wp-content/uploads/2024/02/pre\\_aar.pdf](chrome-extension://efaidnbmnnnibpcajpcgclefindmkaj/https://selfreliancecentral.com/wp-content/uploads/2024/02/pre_aar.pdf).

extension://efaidnbmnnnibpcajpcglclefindmkaj/https://selfreliancecentral.com/wp-content/uploads/2024/02/pre\_aar.pdf.

21. Maui News. Maui Mayor Bissen arrives at the Emergency Operations Center in Wailuku. *Mayor details county response in the early hours of wildfires*. [Online] September 1, 2023. [Cited: February 13, 2024.] <https://www.mauinews.com/news/local-news/2023/09/mayor-details-county-response-in-the-early-hours-of-wildfires/>.

22. Citizen Video by Shane Treu. Fire first reported in Lahaina, named the Lahaina Fire. *Global News*. [Online] August 16, 2023. [Cited: February 13, 2024.] <https://www.youtube.com/watch?v=qe8xsUlaYac>.

23. HECO, Shellee M. Kimura President and CEO. West Maui transmission line tripped offline automatically, requiring manual activation per Reclose Blocking Procedure. *Hawaiian Electric Company*. [Online] October 27, 2023. [Cited: February 13, 2024.] chrome-extension://efaidnbmnnnibpcajpcglclefindmkaj/https://docs.house.gov/meetings/IF/IF02/20230928/116431/HHRG-118-IF02-Wstate-KimuraS-20230928-SD002.pdf.

24. Maui Police Department. MFD reporting pole #843 down on Makanoe Place. There is room to drive around. Requesting lines to be de-energized. *MPD's Preliminary After-Action Report*. [Online] August 8, 2023. [Cited: February 26, 2024.] chrome-extension://efaidnbmnnnibpcajpcglclefindmkaj/https://selfreliancecentral.com/wp-content/uploads/2024/02/pre\_aar.pdf.

25. Maui County; CNN. The Lahaina Fire is reported to be 100% contained. [Online] August 18, 2023. [Cited: February 13, 2024.] <https://www.mauicounty.gov/CivicAlerts.aspx?AID=12622>; <https://www.cnn.com/interactive/2023/08/hawaii-wildfires-timeline-maui-lahaina-dg/index.html>.

26. Resident, Anonymous. Winds began increasing in Kula, Maui. Kula : Interviewed by Author, August 8, 2023.

27. Maui Electric. HECO is attempting to restore power to several thousand customers in West Maui and Upcountry. *Twitter @MauiElectric*. [Online] August 8, 2023. [Cited: February 13, 2024.] <https://twitter.com/MauiElectric/status/1688995644470411265>.

28. Maui Electric. HECO addresses three main transmission lines down in Lahaina. *Twitter @MauiElectric*. [Online] August 8, 2023. [Cited: February 13, 2024.] <https://twitter.com/MauiElectric/status/1689004842415468544>.

29. Maui Electric. HECO responded to downed power lines in Olinda to Piihola and first outages were reported in Kula. *Twitter @MauiElectric*. [Online] August 8, 2023. [Cited: February 13, 2024.] <https://twitter.com/MauiElectric/status/1689004882131394560>.

30. Resident, Anonymous. Powerline arcing witnessed above Kula Lodge in Upcountry. HWY 377 Kula : Interviewed by Author, August 8, 2023.

31. MEMA. Road closure on Lahainaluna Rd from Kelawea Street to Kuialua St. *Twitter @Maui\_EMA*. [Online] August 8, 2023. [Cited: February 13, 2024.] [https://twitter.com/Maui\\_EMA/status/1689018865542668288](https://twitter.com/Maui_EMA/status/1689018865542668288).
32. Residents, Kula. Fire first reported in Kula, named the Kula Fire: Single powerful gust that knocked down trees in several areas including the eucalyptus that landed on the powerline which shot sparks mauka into Kulalani Gulch starting Kula fire, neighbors called fire dep. Kula : Interviewed by Author, August 8, 2023.
33. Christopher Stankis, Public Information Officer Maui Fire and Public Safety. Fire department responds to Kulalani Gulch Kualono Place, The fire behaves erratically from the storm, not supposed to move downhill, wind intensity, not many timestamps due to the chaotic situation. Kula : Interviewed by Author, January 18, 2024.
34. Resident, Anonymous. Firefighters tell the Ainakula neighborhood to stand by for evacuation orders. Kula : Interviewed by Author, August 8, 2023.
35. Maui Police Department. Engine 14 unable to get through in Olinda due to downed power lines. *MPD's Preliminary After-Action Report*. [Online] August 8, 2023. [Cited: February 26, 2024.] [chrome-extension://efaidnbmnnnibpcajpcgiclfindmkaj/https://selfreliancecentral.com/wp-content/uploads/2024/02/pre\\_aar.pdf](chrome-extension://efaidnbmnnnibpcajpcgiclfindmkaj/https://selfreliancecentral.com/wp-content/uploads/2024/02/pre_aar.pdf).
36. National Weather Service. High wind and fire alerts are issued by the National Weather Service. *Twitter @NWSHonolulu*. [Online] August 8, 2023. [Cited: February 13, 2024.] <https://twitter.com/NWSHonolulu/status/1689040628599136256>.
37. Global News. Lahaina power poles sway in the wind courtesy of resident video. *Maui wildfire: Confusion, questions surround timeline of Lahaina fire*. [Online] August 16, 2023. [Cited: February 13, 2024.] <https://www.youtube.com/watch?v=qe8xsUlaYac>.
38. MEMA. Lahainaluna Road is reopened and the following road closures are in place. *Twitter @Maui\_EMA*. [Online] August 8, 2023. [Cited: February 13, 2024.] [https://twitter.com/Maui\\_EMA/status/1689053659072782336](https://twitter.com/Maui_EMA/status/1689053659072782336).
39. MEMA. Shelters open at Hannibal Tavares and Lahaina Civic Center for displaced residents. *Twitter @Maui\_EMA*. [Online] August 8, 2023. [Cited: February 13, 2024.] [https://twitter.com/Maui\\_EMA/status/1689058277865426945](https://twitter.com/Maui_EMA/status/1689058277865426945).
40. MEMA. Structural damage self reporting begins for Maui County. *Twitter @Maui\_EMA*. [Online] August 8, 2023. [Cited: February 13, 2024.] [https://twitter.com/Maui\\_EMA/status/1689072516566790144](https://twitter.com/Maui_EMA/status/1689072516566790144).
41. Maui Police Department. At approximately 2:50 p.m., the officer observed multiple utility poles breaking at their base and falling into the highway, obstructing multiple lanes. *MPD's Preliminary After-Action Report* . [Online] August 8, 2023. [Cited: February 26, 2024.] [chrome-extension://efaidnbmnnnibpcajpcgiclfindmkaj/https://selfreliancecentral.com/wp-content/uploads/2024/02/pre\\_aar.pdf](chrome-extension://efaidnbmnnnibpcajpcgiclfindmkaj/https://selfreliancecentral.com/wp-content/uploads/2024/02/pre_aar.pdf).

42. Maui Police Department.. Fire reported on Lahainaluna Rd to MPD. *MPD's Preliminary After-Action Report* . [Online] August 8, 2023. [Cited: February 26, 2024.] [chrome-extension://efaidnbmnnnibpcajpcgclefindmkaj/https://selfreliancecentral.com/wp-content/uploads/2024/02/pre\\_aar.pdf](chrome-extension://efaidnbmnnnibpcajpcgclefindmkaj/https://selfreliancecentral.com/wp-content/uploads/2024/02/pre_aar.pdf).
43. MEMA. Pi'iholo and Olinda Road are evacuated in response to the Olinda Fire. *Twitter @Maui\_EMA*. [Online] August 8, 2023. [Cited: February 13, 2024.] [https://twitter.com/Maui\\_EMA/status/1689092269759221761](https://twitter.com/Maui_EMA/status/1689092269759221761).
44. HI DOT. Haleakala Hwy closed between Kulalani Dr. and Kualono Pl. due to brush fire. *Twitter @DOTHawaii*. [Online] August 8, 2023. [Cited: February 13, 2024.] <https://twitter.com/DOTHawaii/status/1689086036104957952>.
45. Global News. The brushfire that was contained in Lahaina reignites, and the Lahaina Fire begins. *Shane Treu Resident Cellphone Footage, Jayson Duke Resident Cellphone Footage*. [Online] August 16, 2023. [Cited: February 13, 2024.] <https://www.youtube.com/watch?v=qe8xsUlaYac>.
46. Maui County; CNN;. Shelter in place advisory, evacuation, and road closure. [Online] August 8, 2023. [Cited: February 13, 2024.] <https://www.mauicounty.gov/CivicAlerts.aspx?AID=1263>;  
<https://www.cnn.com/interactive/2023/08/hawaii-wildfires-timeline-maui-lahaina-dg/index.html>.
47. MEMA. A High Wind Warning is issued with localized gusts over 65 MPH. *Twitter @Maui\_EMA*. [Online] August 8, 2023. [Cited: February 13, 2024.] [https://twitter.com/Maui\\_EMA/status/1689089128028418048](https://twitter.com/Maui_EMA/status/1689089128028418048).
48. Office of the Governor; CNN. Acting governor Lt. Gov Sylvia Luke issues an emergency proclamation to activate assistance from State National Guard. [Online] August 8, 2023. [Cited: February 13, 2024.] <https://www.cnn.com/interactive/2023/08/hawaii-wildfires-timeline-maui-lahaina-dg/index.html>; <https://governor.hawaii.gov/newsroom/office-of-the-governor-news-release-emergency-proclamation-for-hurricane-dora-wildfires/>.
49. Maui Electric. HECO activates their incident management team. *Twitter @MauiElectric*. [Online] August 8, 2023. [Cited: February 13, 2024.] <https://twitter.com/MauiElectric/status/1689093099044163584>.
50. Maui Electric. HECO acknowledges 600 upcountry customers are without 30 spans of power lines. *Twitter @MauiElectric*. [Online] August 8, 2023. [Cited: February 13, 2024.] <https://twitter.com/MauiElectric/status/1689093348642922496>.
51. Maui Electric. HECO reports that 12,400 customers are offline and there are more than 30 downed poles on the west side of Maui. *Twitter @MauiElectric*. [Online] August 8, 2023. [Cited: February 13, 2024.] <https://twitter.com/MauiElectric/status/1689093239603621888>.
52. MEMA. An evacuation is ordered for Kulalani Circle and Kulalani Drive. *Twitter @Maui\_EMA*. [Online] August 8, 2023. [Cited: February 13, 2024.] [https://twitter.com/Maui\\_EMA/status/1689098432831684608](https://twitter.com/Maui_EMA/status/1689098432831684608).



53. MEMA. An evacuation is ordered for the Lahaina Kelaweia Mauka subdivision. *Twitter @Maui\_EMA*. [Online] August 8, 2023. [Cited: February 13, 2024.] [https://twitter.com/Maui\\_EMA/status/1689100792312242176](https://twitter.com/Maui_EMA/status/1689100792312242176).
54. MEMA. Hokiokio power lines are cleared and opened to the bypass to let cars out of Lahaina. *Twitter @Maui\_EMA*. [Online] August 8, 2023. [Cited: February 13, 2024.] [https://twitter.com/Maui\\_EMA/status/1689114693385015296](https://twitter.com/Maui_EMA/status/1689114693385015296).
55. MEMA. There is a road closure of Lahaina Bypass, Kahakuloa is now restricted to Kahakuloa residents only. *Twitter @Maui\_EMA*. [Online] August 8, 2023. [Cited: February 13, 2024.] [https://twitter.com/Maui\\_EMA/status/1689110908445106176](https://twitter.com/Maui_EMA/status/1689110908445106176).
56. Noah Tomkinson Resident Cell Phone Footage. Lahaina residents jumped into ocean water as flames approached Front Street. *7News Australia*. [Online] August 8, 2023. [Cited: February 13, 2024.] <https://youtube.com/shorts/9BfqOHqMrjM?si=YIFOdSB9zBSWnoyl>.
57. Maui Police Department. Pulehu Fire begins off of pulehu road heading toward Kihei. *MPD's Preliminary After-Action Report*. [Online] August 8, 2023. [Cited: February 26, 2024.] [chrome-extension://efaidnbmnnnibpajpcglclefindmkaj/https://selfreliancecentral.com/wp-content/uploads/2024/02/pre\\_aar.pdf](chrome-extension://efaidnbmnnnibpajpcglclefindmkaj/https://selfreliancecentral.com/wp-content/uploads/2024/02/pre_aar.pdf).
58. Maui News. Maui County Mayor Bissen signs an emergency proclamation. *Mayor details county response in the early hours of wildfires*. [Online] September 1, 2023. [Cited: February 13, 2024.] <https://www.mauinews.com/news/local-news/2023/09/mayor-details-county-response-in-the-early-hours-of-wildfires/>.
59. Resident, Anonymous. Residents on Olinda Road are trapped by fallen trees, fire approaching and burning homes, then winds switch direction, sparing homes. Olinda : Interviewed by Author, August 8, 2023.
60. Christopher Stankis, Public Information Officer County of Maui Fire and Public Safety. Water is seen pouring out of burned structures. Kula : Interviewed by Author, January 18, 2024.
61. MEMA. No power at shelters Hannibal Tavares and Kihei Community Center. *Twitter @Maui\_EMA*. [Online] August 8, 2023. [Cited: February 13, 2024.] [https://twitter.com/Maui\\_EMA/status/1689174532312170496](https://twitter.com/Maui_EMA/status/1689174532312170496).
62. Maui Police Department. Police evacuate residents on Kaiwahine Street. *MPD's Preliminary After-Action Report*. [Online] August 8, 2023. [Cited: February 26, 2024.] [chrome-extension://efaidnbmnnnibpajpcglclefindmkaj/https://selfreliancecentral.com/wp-content/uploads/2024/02/pre\\_aar.pdf](chrome-extension://efaidnbmnnnibpajpcglclefindmkaj/https://selfreliancecentral.com/wp-content/uploads/2024/02/pre_aar.pdf).
63. Maui Police Department. Kihei officers escorting buses to and from Coast Guard Station Maui with ocean evacuees. *MPD's Preliminary After-Action Report*. [Online] August 8, 2023. [Cited: February 26, 2024.] [chrome-extension://efaidnbmnnnibpajpcglclefindmkaj/https://selfreliancecentral.com/wp-content/uploads/2024/02/pre\\_aar.pdf](chrome-extension://efaidnbmnnnibpajpcglclefindmkaj/https://selfreliancecentral.com/wp-content/uploads/2024/02/pre_aar.pdf).

64. Maui Police Department. Police evacuate Kula Lodge area. *MPD's Preliminary After-Action Report* . [Online] August 8, 2023. [Cited: February 26, 2024.] chrome-extension://efaidnbmnnnibpcajpcgclefindmkaj/https://selfreliancecentral.com/wp-content/uploads/2024/02/pre\_aar.pdf.
65. HI DOT. State routes closed in Lahaina, Kihei, and Makawao. *Twitter @DOTHawaii*. [Online] August 8, 2023. [Cited: February 13, 2024.] <https://twitter.com/DOTHawaii/status/1689181779851354112>.
66. Maui County. Water buffaloes are placed at Kula Fire Station, Kula Community Center, Rice Park and Crater Road – Hydrant 373. *Mayor Bissen issues an emergency proclamation in response to fires*. [Online] <https://www.mauicounty.gov/CivicAlerts.aspx?AID=12639>.
67. Residents, Anonymous. Water loss is observed in Kula and community members begin to form alliances with water storage tanks and fire hoses to assist the fire department. Kula : Interviewed by Author, August 8, 2023.
68. MEMA. Shelter opened at Maui High School. *Twitter @Maui\_EMA*. [Online] August 8, 2023. [Cited: February 15, 2024.] [https://twitter.com/Maui\\_EMA/status/1689186267257610240](https://twitter.com/Maui_EMA/status/1689186267257610240).
69. Maui Police Department. Police coordinating with Kaanapali hotels and preparing for possible mass evacuations. . *MPD's Preliminary After-Action Report* . [Online] August 8, 2023. [Cited: February 27, 2025.] chrome-extension://efaidnbmnnnibpcajpcgclefindmkaj/https://selfreliancecentral.com/wp-content/uploads/2024/02/pre\_aar.pdf.
70. MEMA. Shelter opened at Maui Prep Academy. *Twitter @Maui\_EMA*. [Online] August 8, 2023. [Cited: February 15, 2024.] <https://docs.google.com/document/d/1bdalVBC6LLFB8ehk-GXScP3E4JCgbZnLNIisfRWVzLI/edit>.
71. Seattle Times. Water loss is observed in Lahaina by firefighters trying to fight fires due to power outages pumping water into the system and water leaking out of burned pipes. *As inferno grew, Lahaina's water system collapsed*. [Online] August 8, 2023. [Cited: February 15, 2024.] <https://www.seattletimes.com/nation-world/as-inferno-grew-lahainas-water-system-collapsed/>.
72. Residents, Anonymous. An evacuation order is issued to Ainakula. Kula : Interviewed by Author, August 8, 2023.
73. State of Hawaii Office of the Governor. State of Hawaii Emergency Proclamation Issued by acting Governor of Hawaii about Hurricane Dora. *Proclamation Relating to Wildfires*. [Online] August 9, 2023. [Cited: February 15, 2024.] chrome-extension://efaidnbmnnnibpcajpcgclefindmkaj/https://governor.hawaii.gov/wp-content/uploads/2023/08/2307199-1.pdf.
74. Beat of Hawaii. The Hawaiian Tourism Authority asks all visitors to leave Maui. *Hawaii Asks All Visitors To Leave Maui*. [Online] August 9, 2023. [Cited: February 15, 2024.] <https://beatofhawaii.com/hawaii-asks-all-visitors-to-leave-maui/>.

75. Maui County. 911 service in West Maui is not available. [Online] August 9, 2023. [Cited: February 15, 2024.] <https://www.mauicounty.gov/CivicAlerts.aspx?AID=12640>.
76. MEMA. An evacuation order is issued mauka of Pi'ilani HWY up to Maui Meadows. *Twitter @Maui\_EMA*. [Online] August 9, 2023. [https://twitter.com/Maui\\_EMA/status/1689220015445430272](https://twitter.com/Maui_EMA/status/1689220015445430272).
77. MEMA. An evacuation order is issued for Upper Kimo Road. [Online] *Twitter @Maui\_EMA*, August 9, 2023. [Cited: February 15, 2024.] [https://twitter.com/Maui\\_EMA/status/1689220918860771328](https://twitter.com/Maui_EMA/status/1689220918860771328).
78. MEMA; Wunderground. The Kihei Community Center shelter is closed as a precautionary measure. Inhabitants are being relocated. *Twitter @Maui\_EMA; Deadly Maui Fires Destroy Lahaina Town*. [Online] August 9, 2023. [Cited: February 15, 2024.] [https://twitter.com/Maui\\_EMA/status/1689226056954445824](https://twitter.com/Maui_EMA/status/1689226056954445824); <https://www.wunderground.com/article/news/news/2023-08-09-hawaii-wildfires-maui-lahaina-hurricane-dora>.
79. Martens, Dave. Security Camera from Ainakula Rd. *YouTube*. [Online] August 22, 2023. [Cited: February 15, 2024.] <https://www.youtube.com/watch?v=663kucbxj4k>.
80. MEMA. An evacuation order is issued for Ka'anapali Golf Estates including Kaulapa Loop, Pu'u Anoano St, Hakui Loop, and Wekio Place. *Twitter @Maui\_EMA*. [Online] August 9, 2023. [Cited: February 15, 2024.] [https://twitter.com/Maui\\_EMA/status/1689241326985105408](https://twitter.com/Maui_EMA/status/1689241326985105408).
81. MEMA. Extensive road closures are in place. *Twitter @Maui\_EMA*. [Online] August 9, 2023. [Cited: February 15, 2024.] [https://twitter.com/Maui\\_EMA/status/1689252996410982400](https://twitter.com/Maui_EMA/status/1689252996410982400).
82. MEMA. Red Flag Warning Issued by MEMA. *Twitter @Maui\_EMA*. [Online] August 9, 2023. [Cited: February 15, 2024.] [https://twitter.com/Maui\\_EMA/status/1689264461641875456](https://twitter.com/Maui_EMA/status/1689264461641875456).
83. MEMA. Red flag warning downgraded to a wind advisory by MEMA. *Twitter @Maui\_EMA*. [Online] August 9, 2023. [Cited: February 16, 2024.] [https://twitter.com/Maui\\_EMA/status/1689266090730496000](https://twitter.com/Maui_EMA/status/1689266090730496000).
84. Maui Police Department. Police still evacuating individuals from burn areas. *MPD's Preliminary After-Action Report*. [Online] August 8, 2023. [Cited: February 27, 2024.] [chrome-extension://efaidnbmnnnibpcajpcgclefindmkaj/https://selfreliancecentral.com/wp-content/uploads/2024/02/pre\\_aar.pdf](chrome-extension://efaidnbmnnnibpcajpcgclefindmkaj/https://selfreliancecentral.com/wp-content/uploads/2024/02/pre_aar.pdf).
85. Maui Police Department. First Fatality located and confirmed. *MPD's Preliminary After-Action Report*. [Online] August 8, 2023. [Cited: February 27, 2024.] [chrome-extension://efaidnbmnnnibpcajpcgclefindmkaj/https://selfreliancecentral.com/wp-content/uploads/2024/02/pre\\_aar.pdf](chrome-extension://efaidnbmnnnibpcajpcgclefindmkaj/https://selfreliancecentral.com/wp-content/uploads/2024/02/pre_aar.pdf).
86. Maui County. In response to the Pulehu Fire, an evacuation is ordered for Holopuni, Pulehu, Lipoa to Maui Meadows and Ohukai subdivision. *Lahaina and Upcountry Maui Fires Combined*

*Update No. 3, 12:40 p.m.* [Online] August 9, 2023. [Cited: February 16, 2024.] <https://www.mauicounty.gov/CivicAlerts.aspx?AID=12641>.

87. Maui Now. Hawai'i Telcom announces they have communication loss. *Hawaiian Telcom customers on Maui affected by intermittent service outages.* [Online] August 9, 2023. [Cited: February 16, 2024.] <https://mauinow.com/2023/08/09/hawaiian-telcom-customers-on-maui-affected-by-intermittent-service-outages/>.

88. HI DOT. Approximately 1800 people sheltered in place overnight at the Kahului Airport (OGG) with state highways still closed in some areas. *Twitter @DOTHawaii.* [Online] August 9, 2023. [Cited: February 16, 2024.] <https://twitter.com/DOTHawaii/status/1689285226223067136>.

89. State of Emergency extended to all counties and airtravel to Maui is discouraged. *State of Hawaii Governor.* [Online] August 9, 2023. [Cited: February 16, 2024.] <https://governor.hawaii.gov/newsroom/office-of-the-governor-news-release-emergency-proclamation-for-maui-air-travel-and-hurricane-dora/>.

90. Residents, Anonymous. Community begins unearthing red hot stones that cause hotspot ignition from underground. Kula : Interviewed by Author, August 9, 2023.

91. Christopher Stankis, Maui Fire and Public Safety Public Information Officer. In Kula, hotspots remain underground with occasional flare ups requiring community monitoring vegetation burning underground, smoldering over 100 good intent calls during the smoldering period to present and 72 burning calls. Kula : Interviewed by Author, January 18, 2024.

92. Resident, Anonymous. Water turned back on in Kula. Kula : Interviewed by Author, August 9, 2023.

93. Maui County. The Maui Mayor makes televised address to the communities impacted. *Mayor Richard Bissen offers a public message in light of recent tragedies.* [Online] August 9, 2023. [Cited: February 16, 2024.] <https://www.facebook.com/watch/?v=1353705898828259>.

94. MEMA. A Family Assistance Center is opened in Kahului to help those searching for missing persons impacted by the fires. *Twitter @Maui\_EMA.* [Online] August 9, 2023. [Cited: February 16, 2024.] [https://twitter.com/Maui\\_EMA/status/1689757750279262208](https://twitter.com/Maui_EMA/status/1689757750279262208).

95. The White House. President Biden issues a federal disaster declaration. *President Joseph R. Biden, Jr. Approves Hawaii Disaster Declaration.* [Online] August 10, 2023. [Cited: February 16, 2024.] <https://www.whitehouse.gov/briefing-room/presidential-actions/2023/08/10/president-joseph-r-biden-jr-approves-hawaii-disaster-declaration-3/>.

96. Washington Post. An inter island flotilla of boats deliver supplies to Lahaina because the roadway access to West Maui is limited. *Native Hawaiians organize aid for Maui fire victims as government lags.* [Online] August 12, 2023. [Cited: February 16, 2024.] <https://www.washingtonpost.com/nation/2023/08/12/maui-fires-lahaina-native-hawaiians-disaster-relief-boats/>.

97. Residents, Anonymous. For hygiene and hydration purposes, some Kula community members bathe in and drink yellow drinking water. Kula : Interviewed by Author, August 10, 2023.
98. DLNR. The Olinda Fire is 85% contained. *08/19/23-UPCOUNTRY COMPLEX FIRE – OLINDA SECTION, MAUI*. [Online] August 19, 2023. [Cited: February 16, 2024.] <https://dlnr.hawaii.gov/blog/2023/08/21/nr23-128/>.
99. Maui County. Unsafe Water Alerts (USW) issued by DWS for Upper Kula and Lahaina Public Water Systems. *Unsafe water advisory issued for Upper Kula and Lahaina areas affected by wildfires*. [Online] August 11, 2023. [Cited: February 16, 2024.] <https://www.mauicounty.gov/CivicAlerts.aspx?AID=12680>.
100. Maui County. Maui County announces deployment of CERT (community emergency response team). <https://www.mauicounty.gov/1899/Community-Emergency-Response-Team>. [Online] August 11, 2023. [Cited: February 16, 2024.] <https://docs.google.com/spreadsheets/d/1N2aYojG2J7vx-WcL05tF19GZO-TzvRb3DGSiXkNSqU8/edit#gid=0>.
101. HI DOH. FEMA assigns EPA with the mission assignment to survey, remove, and dispose of hazardous materials on properties affected by the wildfires in Maui. This mission assignment is referred to as Phase 1. *DOH ADVISES CAUTION FOR RESIDENTS RETURNING TO WEST MAUI AREA*. [Online] August 11, 2023. [Cited: February 16, 2024.] <https://health.hawaii.gov/news/newsroom/doh-advises-caution-for-residents-returning-to-west-maui-area/>.
102. Maui County. New maps of Unsafe Water Advisories by DWS are issued and posted on MauiCounty.gov website. <https://www.mauicounty.gov/CivicAlerts.aspx?AID=12695>. [Online] August 13, 2023. [Cited: February 16, 2024.] <https://www.mauicounty.gov/CivicAlerts.aspx?AID=12695>.
103. National news report about the lack of water and dry fire hydrants for fire-fighting in Lahaina during the emergency response. Homeowners are forced to fight fires with pools, hoses and buckets. <https://www.nytimes.com/2023/08/13/us/lahaina-water-failure.html>. [Online] August 13, 2023. [Cited: February 17, 2024.] <https://www.nytimes.com/2023/08/13/us/lahaina-water-failure.html>.
104. Maui News Now. The Kula Fire (also reported as the Upcountry Fire) is 60% contained. *Upcountry Updates: Fire about 60% contained; shelter open; water unsafe in impacted areas*. [Online] August 14, 2023. [Cited: February 17, 2024.] <https://mauinow.com/2023/08/14/upcountry-updates-fire-about-60-contained-shelter-open-water-unsafe-in-impacted-areas/>.
105. Hawaii News Now. More than 46,000 tourists have left the island since the event. *Hawaii Tourism Authority: Visitors have ‘largely heeded call’ to leave Maui*. [Online] August 13, 2023. [Cited: February 17, 2024.] <https://www.hawaiinewsnow.com/2023/08/13/hawaii-tourism-authority-visitors-have-largely-heeded-call-leave-maui/>.

106. Maui County. Maui Police Department suspends placard program for travel into West Maui. *Maui County Press Releases*. [Online] August 14, 2023. [Cited: February 17, 2024.] <https://www.mauicounty.gov/CivicAlerts.aspx?AID=12699>.
107. HI DOH. FIRST SAMPLES COLLECTED: Maui DWS collects the first drinking water samples from their Upper Kula and Lahaina Public Water Systems. *News Releases from Department of Health | Maui Department of Water Supply releases first test results from Lāhainā, Upper Kula water systems (hawaii.gov)*. [Online] August 24, 2023. [Cited: February 22, 2024.] <https://health.hawaii.gov/news/newsroom/maui-department-of-water-supply-releases-first-test-results-from-lahaina-upper-kula-water-systems/>.
108. Maui News Now. Search and rescue continues for survivors of the Lahaina Fire. *Maui wildfire updates for Aug. 14: Placard system SUSPENDED; deaths rise to 99 souls : Maui Now*. [Online] August 14, 2023. [Cited: February 22, 2024.] <https://mauinow.com/2023/08/14/maui-wildfire-updates-for-aug-14-west-maui-placard-system-announced-unsafe-water-maps-released/>.
109. HI DOH. FIRST SAMPLES ANALYZED: Hawaii DOH chemically analyzed drinking water samples from Maui County and obtained chemical results. *News Releases from Department of Health | Maui Department of Water Supply releases first test results from Lāhainā, Upper Kula water systems (hawaii.gov)*. [Online] August 24, 2023. [Cited: February 22, 2024.] <https://health.hawaii.gov/news/newsroom/maui-department-of-water-supply-releases-first-test-results-from-lahaina-upper-kula-water-systems/>.
110. Maui County reports the containment status of the multiple fires: Kula Fire, 75% contained, 678 acres with hotspots in gulches; Lahaina Fire, 85% contained 2170 acres with no active threats; Pulehu/Kihei Fire, 100% contained with no active threats, Pu'uk. *8/15 County of Maui Wildfire Disaster Update as of 8:30 pm*. [Online] August 15, 2023. [Cited: February 22, 2024.] <https://www.mauicounty.gov/CivicAlerts.aspx?AID=12711>.
111. Maui County. The road opens to Lahaina for the first time since the fire. *News Flash • Governor Green announces opening of road to Lah (mauicounty.gov)*. [Online] August 15, 2023. [Cited: February 22, 2024.] <https://www.mauicounty.gov/CivicAlerts.aspx?AID=12705>.
112. Maui County. The first confirmed victims of the wildfires are announced. *News Flash • County releases first confirmed identifications (mauicounty.gov)*. [Online] August 15, 2023. [Cited: February 22, 2024.] <https://www.mauicounty.gov/CivicAlerts.aspx?AID=12707>.
113. UH Water Resources Research Center. UH begins collecting drinking water samples at homes. *Master VOC Data*. [Online] August 16, 2024. [Cited: February 22, 2024.]
114. National news reports on ash and debris chemical exposure and health impact concerns for residents returning to the impact areas. *The burn zone on Maui is laden with toxins, officials say : NPR*. [Online] August 17, 2023. [Cited: February 22, 2024.] <https://npr.org/2023/08/17/1194466944/the-burn-zone-on-maui-is-laden-with-toxins-officials-say>.

115. Reuters. The Maui County Emergency Manager resigns. *Maui's chief of emergency management resigns amid criticism* | Reuters. [Online] August 17, 2023. [Cited: February 22, 2024.] <https://www.reuters.com/world/us/biden-pledges-us-support-maui-through-wildfire-recovery-2023-08-17/>.
116. University of Hawaii. THIS STUDY: Purdue University disaster response team arrives in Honolulu and teams up with University of Hawaii experts already working in Hawaii. University of Hawaii hosts a wildfire technical webinar about drinking water contamination. *After the Fire: The Importance of Scientific Support in Protecting Health and Recovery – UHM Water Resources Research Center (hawaii.edu)*. [Online] August 18, 2023. [Cited: February 22, 2024.] <https://www.wrrc.hawaii.edu/after-the-fire-the-importance-of-scientific-support-in-protecting-health-and-recovery/>.
117. Purdue University. THIS STUDY: Purdue University team arrives in Maui and begins Maui household survey. *What's in the water? UH, Purdue researchers are sampling Kula system*. [Online] August 26, 2023. [Cited: February 22, 2024.] <https://www.mauinews.com/news/local-news/2023/08/whats-in-the-water-uh-purdue-researchers-are-sampling-kula-system/>.
118. Maui County. EXPANDED AREA: Maui County expands the Unsafe Water Alert area in Lahaina based on concerns contaminated water may be outside the initial Unsafe Water Alert advisory area. *Unsafe Water Advisory for Lahaina water system expanded*. [Online] August 19, 2023. [Cited: February 22, 2024.] <https://www.mauicounty.gov/CivicAlerts.aspx?AID=12732>.
119. Associated Press. News report that after some prior US wildfires, in-home water filters may be incapable of making the contaminated drinking water safe. *Maui water is unsafe even with filters, one of the lessons learned from fires in California* | AP News. [Online] August 19, 2023. [Cited: February 22, 2024.] <https://apnews.com/article/wildfire-water-contamination-maui-hawaii-fires-c547955833ceaf86af8c3f1553f1f546>.
120. ABC News. President Biden visits Maui. *President Biden, first lady visit Maui to hear from survivors after devastating wildfires - ABC News (go.com)*. [Online] August 21, 2023. [Cited: February 22, 2024.] <https://abcnews.go.com/Politics/president-biden-lady-visit-maui-after-wildfires/story?id=102408000>.
121. Lahaina News. University of Hawaii launches Drinking Water Information Hub to serve as a community information resource and to other relevant sources of information. *Safety of Maui drinking water focus of UH research* | News, Sports, Jobs - Lahaina News. [Online] September 12, 2023. [Cited: February 22, 2024.] <https://www.lahainanews.com/news/local-news/2023/09/12/safety-of-maui-drinking-water-focus-of-uh-research/>.
122. Purdue University. Purdue University, University of Hawaii, Robby Seeger, and experts from Paradise and Santa Rosa, California Louisville and Superior, Colorado meet with Maui DWS to provide drinking water system disaster response technical assistance. *Purdue professor 'brings the world' to help after Maui, Hawaii, wildfires*. [Online] September 25, 2023. [Cited: February 22, 2024.] <https://stories.purdue.edu/purdue-professor-brings-the-world-to-help-after-maui-hawaii-wildfires/>.

123. Maui Now. Some shelters are closed and persons in those shelters are moved to temporary housing. *Lahaina wildfire recovery Day 20: land search is complete, survivors are no longer expected*. [Online] August 28, 2023. [Cited: February 22, 2024.]

<https://mauinow.com/2023/08/28/lahaina-wildfire-recovery-day-20-land-search-is-complete-survivors-are-no-longer-expected/>.

124. Maui County. "A helicopter is deployed to work on hot spots in response to the Kula Fire and Olinda Fire and containment update . Maui County reports the containment status of the multiple fires: Olinda Fire, 85% contained. Estimated 1,081 acres; Kula fire, 85% cont. 8/23 *County of Maui Wildfire Disaster Update*. [Online] August 23, 2023. [Cited: February 22, 2024.] <https://www.mauicounty.gov/CivicAlerts.aspx?AID=12756>.

125. Maui County. The USEPA begins hazardous materials removal in Kula. *News Flash • 8/23/2023 — U.S. EPA begins hazardous waste rem (mauicounty.gov)*. [Online] August 23, 2023. [Cited: February 22, 2024.]

<https://www.mauicounty.gov/CivicAlerts.aspx?AID=12757#:~:text=The%20U.S.%20Environmental%20Protection%20Agency%20%28EPA%29%20on%20Wednesday,includin%20paints%2C%20cleaners%2C%20solvents%2C%20oils%2C%20batteries%2C%20and%20pesticides..>

126. Forbes. The Hawaii Governor publicly asks tourists to return to Maui. *Hawaii Travel Update: Governor Asks Tourists To Come Back To Maui (forbes.com)*. [Online] August 23, 2023. [Cited: February 22, 2024.]

<https://www.forbes.com/sites/willmcgough/2023/08/23/hawaii-travel-update-governor-asks-tourists-to-come-back-to-maui/?sh=32ec080c551f>.

127. Hawaii News Now. National news reports that some Lahaina residents who did not evacuate have no power, donations are locally organized, some residents complain about breathing problems if breathing the air for "5 minutes". *The air is bad and the power is off, but these Lahaina families aren't going anywhere (hawaiinewsnow.com)*. [Online] August 24, 2023. [Cited: February 22, 2024.] <https://www.hawaiinewsnow.com/2023/08/25/air-is-bad-power-is-off-these-lahaina-families-arent-leaving-their-homes/>.

128. *Purdue University, and other experts from Paradise, California, and Louisville, Colorado meet with Native Hawaiian households to provide advice on response and recovery in the context of insurance, government reimbursements, and water system damage assess*. Lahaina, August 24, 2023.

129. Maui County. PUBLIC MEETING: The first public meeting with the DWS and community is held in Kula. Elected leaders (Maui Mayor Bissen, Vice-Chair Councilwoman Uki Lei Sigumura), DWS, Upcountry Strong/ Kula Hub (Tim Lara), Kula Lodge Team, American Red Cross, FEMA, Maui. <https://www.mauicounty.us/press-release/kula-community-meeting-tomorrow-night-on-water-safety/>. [Online] August 23, 2023. [Cited: February 22, 2024.] <https://www.mauicounty.us/press-release/kula-community-meeting-tomorrow-night-on-water-safety/>.



130. HI DOH. FIRST TEST RESULTS RELEASED: For the first time, DWS releases their first public test results (27 samples) from Upper Kula and Lahaina Public Water Systems. Samples were collected August 14, 6 days after the evacuation. Benzene and total xylenes were some. *News Releases from Department of Health | Maui Department of Water Supply releases first test results from Lāhainā, Upper Kula water systems (hawaii.gov)*. [Online] August 24, 2023. [Cited: February 22, 2024.] <https://health.hawaii.gov/news/newsroom/maui-department-of-water-supply-releases-first-test-results-from-lahaina-upper-kula-water-systems/>.
131. Maui County. For the first time, DWS makes first test results from Upper Kula and Lahaina Public Water System publicly available. *News Flash • Long-Term Monitoring Program samples for 11/29/ (mauicounty.gov)*. [Online] August 23, 2023. [Cited: February 22, 2022.] <https://www.mauicounty.gov/CivicAlerts.aspx?AID=12755>.
132. Maui County. Maui County provides private home testing information including phone numbers for Aecos Laboratory and FoodQuality Labs. Maui County recommends homeowners ask for the "VOC Test Panel". *Water Quality Laboratory Information*. [Online] August 24, 2023. [Cited: February 22, 2023.] <https://www.mauicounty.gov/CivicAlerts.aspx?AID=12760>.
133. Honolulu Civil Beat. Local news reports that a Kula resident mentions that with communications down her family was unaware the water system was unsafe, and friends and family were how she found out. She recommends written notices be sent when communications are down or spotty. *What About The Water?' Upcountry Residents Want Answers After Maui Fires Prompt Advisories - Honolulu Civil Beat*. [Online] August 24, 2023. [Cited: February 22, 2024.] <https://www.civilbeat.org/2023/08/what-about-the-water-upcountry-residents-want-answers-after-maui-fires-prompt-advisories/>.
134. Maui County. The new Maui Emergency Management Agency Director is announced. *News Flash • Darryl Oliveira hired as interim director of Ma (mauicounty.gov)*. [Online] August 25, 2023. [Cited: February 22, 2024.] <https://www.mauicounty.gov/CivicAlerts.aspx?AID=12769>.
135. MEMA. Firefighters respond to Kaanapali Hillside from Anapuni Loop to West Mahipulu. *Twitter @Maui\_EMA*. [Online] August 26, 2023. [Cited: February 22, 2024.] [https://twitter.com/Maui\\_EMA/status/1695595600182710487](https://twitter.com/Maui_EMA/status/1695595600182710487).
136. MEMA. The Ka'anapali Fire evacuation order is lifted. *Twitter @Maui\_EMA*. [Online] August 26, 2023. [Cited: February 22, 2024.] [https://twitter.com/Maui\\_EMA/status/1695639217467252849](https://twitter.com/Maui_EMA/status/1695639217467252849).
137. *THIS STUDY: Purdue University, University of Hawaii, and Louisville Colorado experts conduct inspection of agricultural water systems at the request of the Hawaii Department of Agriculture in and around the burn area*. Maui, August 27, 2023.
138. Hawaii DOH issued a factsheet about VOCs in drinking water, then updated September 2023. *Volatile Organic Compounds (VOCs) Fact Sheet*. [Online] August 27, 2023. [Cited: February 2024, 2024.] <https://www.mauicounty.gov/CivicAlerts.aspx?AID=12781>.

139. Maui Now. At this 20 day mark, the search for survivors ends. *Lahaina wildfire recovery Day 20: land search is complete, survivors are no longer expected*. [Online] August 28, 2023. [Cited: February 22, 2024.] <https://mauinow.com/2023/08/28/lahaina-wildfire-recovery-day-20-land-search-is-complete-survivors-are-no-longer-expected/>.
140. Hawaii News Now. Schools in Lahaina remain closed from the fire. *DOE announces tentative timeframe to welcome students back to West Maui schools (hawaiinewsnow.com)*. [Online] August 29, 2023. [Cited: February 22, 2024.] <https://www.hawaiinewsnow.com/2023/08/30/doe-announces-tentative-timeframe-welcome-students-back-west-maui-schools/>.
141. Maui County. Maui County delivering solar showers to Upcountry Unsafe Water Alert areas. *News Flash • 8/29 County of Maui distributing more than 1,00 (mauicounty.gov)*. [Online] August 29, 2023. [Cited: February 22, 2024.] <https://www.mauicounty.gov/CivicAlerts.aspx?AID=12788>.
142. ABC NEWS. National news reports that the search for fire victims on land ends, now moves to nearshore waters. *Maui wildfire victims search on land ends, moves to the ocean - ABC News (go.com)*. [Online] August 29, 2023. [Cited: February 23, 2024.] <https://abcnews.go.com/US/maui-officials-search-wildfire-victims-ocean-land-search/story?id=102648231>.
143. Maui County. Maui County announces that solar showers are being made available to residents in the Upcountry Unsafe Water Alert areas. *News Flash • 09/05 Solar shower bags available today for Upc (mauicounty.gov)*. [Online] September 5, 2023. [Cited: February 23, 2024.] <https://www.mauicounty.gov/CivicAlerts.aspx?AID=12814>.
144. Maui County. Reduction of potable water tanker locations down to two sites in Kula. *Location of potable water tankers in Upper Kula and Lahaina as of 10/30/2023*. [Online] September 7, 2023. [Cited: February 23, 2024.] <https://www.mauicounty.gov/CivicAlerts.aspx?AID=12824>.
145. NBC News. Filipinos in Lahaina say they've been overlooked in wildfire response. [Online] September 7, 2023. [Cited: February 27, 2024.] <https://www.nbcnews.com/news/asian-america/filipinos-maui-hawaii-wildfires-rcna102375>.
146. Maui County. Maui County announces a reminder that USW alert remains in effect for the Upper Kula public water system. *News Flash • 09/09 Unsafe Water Advisory reminder for Upper (mauicounty.gov)*. [Online] September 9, 2023. [Cited: February 23, 2024.] <https://www.mauicounty.gov/CivicAlerts.aspx?AID=12831>.
147. HI DOH. Hawaii DOH announces toluene detected in the Upper Kula Public Water System. *News Releases from Department of Health | Trace amount of toluene detected in Upper Kula water system (hawaii.gov)*. [Online] September 11, 2023. [Cited: February 23, 2024.] <https://health.hawaii.gov/news/newsroom/trace-amount-of-toluene-detected-in-upper-kula-water-system/>.

148. Maui County removes a portion of Upper Kula removed from Unsafe Water Alert advisory. *News Flash • 09/12 Notice: Amended Unsafe Water Advisory for (mauicounty.gov)*. [Online] September 12, 2024. [Cited: February 23, 2024.] <https://www.mauicounty.gov/CivicAlerts.aspx?AID=12844>.
149. HI DOH. HI DOH releases air testing results for Lahaina and Upcountry for the first time. *News Releases from Department of Health | DOH releases preliminary, unvalidated data from Maui air sampling (hawaii.gov)*. [Online] September 12, 2023. [Cited: February 23, 2024.] <https://docs.google.com/spreadsheets/d/1N2aYojG2J7vx-WcL05tF19GZO-TzvRb3DGSiXkNSqU8/edit#gid=0>.
150. Maui County. Maui County warns that sewer service remains inactive since the wildfires for many properties in the fire impacted areas and that toilet flushing and other activities should not be conducted. Lift stations and power systems were damaged. *News Flash • 09/13 Sewer service inactive for many standing (mauicounty.gov)*. [Online] September 13, 2023. [Cited: February 23, 2024.] <https://www.mauicounty.gov/CivicAlerts.aspx?AID=12846>.
151. WRRC. *UH begins returning drinking water results to homeowners*. September 17, 2023.
152. Commission on Water Resource Management. CWRM Posts an update on Water Resources in the Lahaina Aquifer Sector Area. *Update on Water Resources in the Lahaina Aquifer Sector Area Agenda Item C-1*. [Online] September 13, 2023. [Cited: February 27, 2024.] <chrome-extension://efaidnbnmnnibpcajpcgclclefindmkaj/https://files.hawaii.gov/dlnr/cwrmsubmittal/2023/sb20230919C1.pdf>.
153. Maui County. Containment Announcement: Olinda fire: 90% contained. Estimated 1,081 acres. Kula fire: 96% contained. Estimated 202 acres. Lahaina fire: 100% contained. Estimated 2,170 acres. *9/20 MAUI WILDFIRE DISASTER UPDATE*. [Online] September 20, 2023. [Cited: February 23, 2024.] <https://docs.google.com/spreadsheets/d/1N2aYojG2J7vx-WcL05tF19GZO-TzvRb3DGSiXkNSqU8/edit#gid=0>.
154. Associated Press. Lahaina residents begin to be allowed to return to their properties for supervised visits. *Lahaina residents brace for what they'll find as they return to devastated properties in burn zone | AP News*. [Online] September 20, 2023. [Cited: February 23, 2024.] <https://apnews.com/article/lahaina-maui-wildfire-reentry-9ae428c3af31f3ebb224157aeb4efff4>.
155. Maui County. Lauiniupoko beach park opens. *Popular Lauiniupoko Beach Park reopens after county staff who lost homes work on project*. [Online] September 23, 2023. [Cited: February 23, 2024.] <https://www.mauicounty.gov/CivicAlerts.aspx?AID=12886>.
156. Maui County. The first phase of residential reentry in Lahaina begins. *News Flash • 09/25 Residents in Zone 1C return to their Laha (mauicounty.gov)*. [Online] September 25, 2023. [Cited: February 23, 2024.] <https://www.mauicounty.gov/CivicAlerts.aspx?AID=12891>.
157. Maui County. Containment announcement: Olinda fire: Increased to 95% contained. Estimated 1,081 acres. Kula fire: 96% contained. Estimated 202 acres. Lahaina fire: 100% contained. Estimated 2,170 acres. *9/25 MAUI WILDFIRE DISASTER UPDATE*. [Online]

September 25, 2023. [Cited: February 23, 2024.]  
<https://www.mauicounty.gov/CivicAlerts.aspx?AID=12890>.

158. Civil Beat. The Hawaii Department of Education announces that school begins October 16 in Lahaina, the first day back since the fire in August. *Lahaina Schools To Reopen Some 2 Months After Fire - Honolulu Civil Beat*. [Online] September 26, 2023. [Cited: February 23, 2024.] <https://www.civilbeat.org/2023/09/lahaina-schools-to-reopen-some-2-months-after-fire/>.

159. HI DOH. The Hawaii DOH revised and reissued a fact sheet about how residents can protect themselves from wildfire debris hazards. The Hawaii DOH revised and reissued a fact sheet about how residents can protect themselves from wildfire debris hazards. *Hazard Advisory (hawaii.gov)*. [Online] September 27, 2023. [Cited: February 23, 2024.] <chrome-extension://efaidnbmnnnibpcajpcgclefindmkaj/https://health.hawaii.gov/mauiwildfires/files/2023/08/Hazards-Advisory.pdf>.

160. Maui County. Maui County announces that a portion of Upper Kula and Lahaina removed from Unsafe Water Alert advisory. <https://www.mauicounty.gov/CivicAlerts.aspx?AID=12926>. [Online] October 6, 2023. [Cited: February 23, 2024.]  
<https://www.mauicounty.gov/CivicAlerts.aspx?AID=12926>.

161. Maui County. Phased reopening begins for tourism on the west side. *County of Maui releases series of video messages for the Maui community and its visitors*. [Online] October 7, 2023. [Cited: February 27, 2024.] <https://www.mauicounty.gov/CivicAlerts.aspx?AID=12930>.

162. Maui County. Maui County approves the use of Soiltac for wildfire impact areas. *Use of soil stabilizer Soiltac® approved for properties impacted by August 8th fire in Lahaina*. [Online] October 9, 2023. [Cited: February 27, 2024.]  
<https://www.mauicounty.gov/CivicAlerts.aspx?AID=12937>.

163. —. Maui County announces that a portion of Upper Kula and Lahaina removed from Unsafe Water Alert advisory. *News Flash • Upper Kula Area UK-4 and Lahaina Area L-2 removed (mauicounty.gov)*. [Online] October 9, 2023. [Cited: February 27, 2024.]  
<https://www.mauicounty.gov/CivicAlerts.aspx?AID=12936>.

164. Maui County. Maui County proposes 3 billing categories for drinking water customers in the fire impact areas. *News Flash • County of Maui proposing three billing categories (mauicounty.gov)*. [Online] October 12, 2023. [Cited: February 27, 2024.]  
<https://www.mauicounty.gov/CivicAlerts.aspx?AID=12942>.

165. Maui County. Upper Kula area UK3 removed from unsafe water advisory. *Portion of Upper Kula removed from Unsafe Water Advisory area*. [Online] October 13, 2023. [Cited: February 27, 2024.] <https://www.mauicounty.gov/CivicAlerts.aspx?AID=12952>.

166. KHON2. The Hawaii DOH releases results of Kula ash and debris chemical testing. *DOH: 'Extremely high levels' of arsenic and other materials detected in Kula ash | KHON2*. [Online] October 15, 2023. [Cited: February 27, 2024.] <https://www.khon2.com/top-stories/high-levels-of-toxins-in-kula-ash-prompt-new-guidance-from-doe-as-lahaina-schools-reopen/>.

167. HI DOH. The Hawaii Department of Health revised and reissued a factsheet about wildfire ash health risks. *Toxins in Maui Wildfire Ash (hawaii.gov)*. [Online] October 18, 2023. [Cited: February 27, 2024.] <https://health.hawaii.gov/mauiwildfires/files/2023/10/DOH-Maui-Ash-Toxins-Fact-Sheet.pdf>.

168. Hawaii News Now. DWS removes water meters from burned homes. *Kula residents who lost homes in fire say county took much-needed water meters*. [Online] October 27, 2023. [Cited: February 27, 2024.] <https://www.hawaiinewsnow.com/video/2023/10/27/kula-residents-who-lost-homes-fire-say-county-took-much-needed-water-meters/>.

169. Maui County. For Upper Kula Public Water System, DWS lifts the last USW alerts. USW still in place for parts of Lahaina public water system. *News Flash • Unsafe Water Advisory lifted for all areas of U (mauicounty.gov)*. [Online] October 31, 2023. [Cited: February 27, 2024.] <https://www.mauicounty.gov/CivicAlerts.aspx?AID=12999#:~:text=The%20Department%20of%20Water%20Supply%20has%20lifted%20the,safe%20for%20unrestricted%20use%20effective%20October%2031%2C%202023..>

170. Maui County. Unsafe Water Advisory lifted for all areas of Upper Kula. <https://www.mauicounty.gov/CivicAlerts.aspx?CID=7>. [Online] November 1, 2023. [Cited: February 27, 2024.] <https://www.mauicounty.gov/CivicAlerts.aspx?CID=7>.

171. USEPA. USEPA begins removal of hazardous materials in Lahaina impact area. *EPA Begins Hazardous Materials Removal on Commercial Properties in Lāhainā, Maui | US EPA*. [Online] November 3, 2023. [Cited: February 27, 2024.] <https://docs.google.com/spreadsheets/d/1N2aYojG2J7vx-WcL05tF19GZO-TzvRb3DGSiXkNSqU8/edit#gid=0>.

172. Maui County. New red flag warning issued. *News Flash • Public advised to remain vigilant with Red Flag (mauicounty.gov)*. [Online] November 5, 2023. [Cited: February 27, 2024.] <https://www.mauicounty.gov/CivicAlerts.aspx?AID=13010>.

173. Maui County. Lahaina underground parking garage flooded since August wildfires begins to be drained. *News Flash • 11/16/2023 Work to drain underground parking ga (mauicounty.gov)*. [Online] November 16, 2023. [Cited: February 27, 2024.] <https://www.mauicounty.gov/CivicAlerts.aspx?AID=13045>.

174. Maui County. Maui County announces that a portion of Lahaina removed from Unsafe Water Alert advisory. *News Flash • Portion of Lahaina removed from Unsafe Water Ad (mauicounty.gov)*. [Online] November 21, 2023. [Cited: February 27, 2024.] <https://www.mauicounty.gov/CivicAlerts.aspx?AID=13054>.

175. Maui County. Lahaina customers within and near the burn zone are asked to reduce toilet flushing, bathing, washing clothes and cleaning dishes. *County Wastewater Reclamation Division prepares for kona low weather system, asks for West Maui sewe*. [Online] November 29, 2023. [Cited: February 27, 2024.] <https://www.mauicounty.gov/CivicAlerts.aspx?AID=13054>.

176. USEPA. USEPA completes removal of hazardous materials for Phase 1 in ALL wildfire impacted areas . *EPA Completes Removal of Hazardous Materials Following Wildfires on Maui | US EPA*. [Online] December 1, 2023. [Cited: March 1, 2024.] <https://www.epa.gov/newsreleases/epa-completes-removal-hazardous-materials-following-wildfires-maui>.
177. Maui County. Maui County experiences the first significant rainfall event since the wildfires. *News Flash • Heavy rain spurs flooding, road closures; W. Ma (mauicounty.gov)*. [Online] November 30, 2023. [Cited: March 1, 2024.] <https://www.mauicounty.gov/CivicAlerts.aspx?AID=13088>.
178. HI DOH. Hawaii DOH releases results of Lahaina ash and debris chemical testing. *Governor Josh Green, M.D. | DOH News Release – Lahaina Ash Characterization Testing Show Elevated Levels of Toxic Substances (hawaii.gov)*. [Online] December 10, 2023. [Cited: March 1, 2024.] <https://governor.hawaii.gov/newsroom/doh-news-release-lahaina-ash-characterization-testing-show-elevated-levels-of-toxic-substances/>.
179. Maui County. All zones now open in Lahaina. *News Flash • County of Maui completes re-opening of all 83 L (mauicounty.gov)*. [Online] December 12, 2023. [Cited: March 1, 2024.] <https://www.mauicounty.gov/CivicAlerts.aspx?AID=13116>.
180. Civil Beat. More than 6,200 residents displaced by the wildfires, comprising 2,623 households, remain spread across 33 hotels and condominiums. *Families Displaced By The Maui Fires Are Tired Of Shuffling Between Hotel Rooms - Honolulu Civil Beat*. [Online] December 13, 2023. [Cited: March 1, 2024.] <https://www.civilbeat.org/2023/12/families-displaced-by-the-maui-fires-are-tired-of-shuffling-between-hotel-rooms/>.
181. Maui County. Maui County announces that a portion of Lahaina removed from Unsafe Water Alert advisory area. *News Flash • DWS lifts unsafe water advisory for area near L (mauicounty.gov)*. [Online] December 14, 2023. [Cited: March 1, 2024.] <https://www.mauicounty.gov/CivicAlerts.aspx?AID=13117>.
182. Office of the Governor. Governor Extends Emergency Proclamation. *OFFICE OF THE GOVERNOR – NEWS RELEASE – GOVERNOR GREEN EXTENDS EMERGENCY PROCLAMATION ON WILDFIRES*. [Online] January 5, 2024. [Cited: March 1, 2024.] <https://governor.hawaii.gov/newsroom/office-of-the-governor-news-release-governor-green-extends-emergency-proclamation-on-wildfi/>.
183. Maui News Now. First property impacted by the Lahaina fire is cleared of debris. *Milestone moment as first property is cleared of residential wildfire debris in Lahaina, Maui : Maui Now*. [Online] January 18, 2024. [Cited: March 1, 2024.] <https://mauinow.com/2024/01/18/milestone-moment-as-first-property-is-cleared-of-residential-wildfire-debris-in-lahaina-maui/>.
184. Maui County. Maui County announces that a portion of Lahaina removed from Unsafe Water Alert advisory area. *Maui County announces that a portion of Lahaina removed from Unsafe Water Alert advisory area*. [Online] News Flash • Portion of Lahaina removed from

Unsafe Water Ad (mauicounty.gov), January 19, 2024. [Cited: March 1, 2024.]  
<https://www.mauicounty.gov/CivicAlerts.aspx?AID=13217>.

185. Maui News. HI DOH announces increased air quality monitoring during debris removal. *DOH to increase air monitoring, sampling during debris removal | News, Sports, Jobs - Maui News*. [Online] January 23, 2024. [Cited: March 1, 2024.]  
<https://www.mauinews.com/news/local-news/2024/01/doh-to-increase-air-monitoring-sampling-during-debris-removal/>.

186. Maui County. Portions of Lahaina Removed from Unsafe Water Advisory. *Portion of Lahaina removed from Unsafe Water Advisory*. [Online] February 16, 2024. [Cited: March 1, 2024.]  
<https://www.mauicounty.gov/CivicAlerts.aspx?AID=13282>.

187. More than 2,700 participate in county surveys on possible Permanent Disposal sites for toxic debris. *More than 2,700 participate in county surveys on possible PDS sites*. [Online] February 22, 2024. [Cited: March 1, 2024.]  
<https://www.mauicounty.gov/CivicAlerts.aspx?AID=13290>.

188. Maui News Now. EPA completes night operations on sanitary sewer lines in Lahaina. *Maui News*. [Online] March 5, 2024. <https://mauinow.com/2024/03/05/epa-completes-night-operations-on-sanitary-sewer-lines-in-lahaina/>
